# Supplementary material for: Confirmation of HLA-II associations with TB susceptibility in admixed African samples
Source: eLife. 2025 Jun 3;13:RP99200. doi: 10.7554/eLife.99200 (PMC12133154; doi:10.7554/eLife.99200)
Supplement: Supplementary file 1. [file elife-99200-supp1.xlsx]

## Sheet: Supplementary File 1
Position	Marker name	Ref	Alt	AltFreq	p-value (KhoeSan local ancestry)	p-value (Bantu-speaking African local ancestry)
32576009	rs482205	T	G	0.322	0.032	0.116
32576019	rs482162	T	C	0.322	0.032	0.116
