# Supplementary material for: Confirmation of HLA-II associations with TB susceptibility in admixed African samples
Source: eLife. 2025 Jun 3;13:RP99200. doi: 10.7554/eLife.99200 (PMC12133154; doi:10.7554/eLife.99200)
Supplement: Supplementary file 2. [file elife-99200-supp2.xlsx]

## Sheet: Supplementary File 2
Dataset	Number of individuals	Number of variants	Genotyping call rate
Affymetrix 500k	733	378 225	0.989798
MEGA array 1.1M	996	1 132 930	0.998441
H3Africa array (TANDEM cohort)	294	1 881 171	0.995993
H3Africa array (NCTB cohort)	160	1 418 505	0.985796
H3Africa (TRUST cohort)	61	1 689 209	0.997322
Xhosa SNP subset	161	1 922 823	1
