# Supplementary material for: Confirmation of HLA-II associations with TB susceptibility in admixed African samples
Source: eLife. 2025 Jun 3;13:RP99200. doi: 10.7554/eLife.99200 (PMC12133154; doi:10.7554/eLife.99200)
Supplement: Supplementary file 3. [file elife-99200-supp3.xlsx]

## Sheet: Sample covariate data
Sample ID	Class	Age	Gender	KhoeSan Ancestry Proportion	Bantu-speaking African Ancestry Proportion	European Ancestry Proportion	Southeast Asian Ancestry Proportion	East Asian Ancestry Proportion
1	Case	62	Female	0.312725	0.148584	0.382495	0.0877195	0.0684768
2	Case	32	Male	0.193728	0.181919	0.31312	0.216013	0.09522
3	Case	15.2027	Female	0.478732	0.212678	0.187393	0.0766345	0.0445645
4	Case	26.937	Female	0.19901	0.258989	0.344146	0.143896	0.05396
5	Case	36.2301	Female	0.305923	0.09072	0.438606	0.11536	0.0493886
6	Case	53	Male	0.0688991	0.217593	0.387175	0.22053	0.105801
7	Case	36	Male	0.29259	0.221047	0.29316	0.13456	0.0586427
8	Control	33	Female	0.215555	0.725106	0.0228855	0.018695	0.0177559
9	Control	40.4219	Male	0.245802	0.170956	0.290422	0.203651	0.0891691
10	Case	28.8301	Male	0.36595	0.455455	0.122634	0.0343791	0.0215836
11	Control	27	Female	0.124205	0.420691	0.185366	0.187769	0.0819677
12	Control	24.5068	Female	0.248418	0.311357	0.227357	0.139808	0.0730609
13	Case	19.2959	Male	0.615547	0.0743709	0.194225	0.0770077	0.0388495
14	Case	41.8986	Female	0.301375	0.585789	0.06271	0.0335932	0.0165318
15	Case	44	Female	0.237158	0.370857	0.179125	0.148677	0.0641827
16	Case	2	Male	0.516268	0.12146	0.235496	0.0855755	0.0411977
17	Case	29.1507	Female	0.35143	0.211434	0.269661	0.111187	0.0562877
18	Case	35	Male	0.168756	0.275972	0.260675	0.213284	0.0813136
19	Case	20.6822	Female	0.00528182	0.0101155	0.535108	0.331206	0.11829
20	Case	40	Female	0.307938	0.190361	0.239196	0.186475	0.0760282
21	Control	22.0055	Female	0.304264	0.326698	0.20575	0.117618	0.0456709
22	Control	23.063	Female	0.242712	0.21694	0.370758	0.119103	0.0504886
23	Case	1.86849	Male	0.477333	0.228146	0.169472	0.0818059	0.0432436
24	Case	31.4959	Male	0.39084	0.131434	0.33779	0.0924655	0.0474709
25	Control	31.2137	Female	0.273644	0.260731	0.361818	0.0657205	0.0380882
26	Control	31.726	Female	0.186359	0.424264	0.218296	0.119339	0.0517432
27	Control	22.1233	Female	0.233954	0.218395	0.303099	0.162429	0.0821227
28	Control	24	Male	0.273351	0.595183	0.0541018	0.0511459	0.0262186
29	Case	27	Male	0.360908	0.271598	0.243522	0.0744109	0.0495582
30	Case	52.2384	Male	0.38893	0.139052	0.296813	0.122077	0.0531273
31	Control	15.8877	Female	0.183966	0.775923	0.0221091	0.00917045	0.00883091
32	Case	20	Female	0.328394	0.217136	0.341516	0.0709323	0.0420232
33	Control	31.2247	Female	0.208162	0.276719	0.291146	0.155619	0.0683523
34	Case	20	Female	0.406694	0.272062	0.188531	0.0982	0.0345159
35	Control	56	Male	0.268429	0.42151	0.153126	0.106196	0.0507377
36	Control	30.4822	Female	0.0416764	0.121842	0.512749	0.219683	0.104046
37	Case	25.063	Female	0.200782	0.751964	0.0230577	0.0139991	0.0101991
38	Control	30	Female	0.147813	0.17149	0.417755	0.1837	0.0792405
39	Case	31.3644	Male	0.223719	0.705486	0.0374441	0.020355	0.0129973
40	Case	37	Male	0.211578	0.214123	0.376857	0.132666	0.0647777
41	Case	22	Female	0.303763	0.395391	0.181351	0.0803264	0.0391673
42	Case	26	Female	0.20033	0.382062	0.280187	0.0898445	0.0475764
43	Case	42	Male	0.253757	0.446653	0.144898	0.106342	0.0483495
44	Case	48.5753	Male	0.0968218	0.130203	0.49977	0.194966	0.0782391
45	Control	40	Male	0.22272	0.111539	0.530882	0.0847141	0.0501423
46	Case	28.7342	Female	0.31128	0.399758	0.152881	0.093425	0.0426559
47	Case	33.6712	Male	0.451885	0.39264	0.0976182	0.0427045	0.0151532
48	Case	47.2274	Male	0.310364	0.460682	0.116028	0.0685173	0.0444091
49	Case	19	Male	0.29506	0.366522	0.209437	0.0767627	0.0522168
50	Case	55.063	Female	0.175296	0.26306	0.353131	0.141733	0.0667805
51	Control	43	Female	0.232605	0.23138	0.288757	0.176587	0.0706732
52	Control	54.5836	Female	0.162006	0.267735	0.291086	0.190794	0.0883773
53	Case	42	Female	0.388636	0.190091	0.27843	0.0999132	0.0429291
54	Control	27.0877	Female	0.381881	0.28331	0.226924	0.0697077	0.0381782
55	Case	3	Female	0.376369	0.392065	0.141799	0.0614677	0.0282959
56	Control	29.5315	Male	0.230473	0.360102	0.269114	0.0885741	0.051735
57	Control	45.0521	Female	0.13328	0.264056	0.353534	0.175872	0.0732573
58	Control	18.3562	Female	0.192475	0.282931	0.294042	0.150461	0.0800905
59	Case	35	Female	0.231147	0.31364	0.196978	0.177057	0.0811768
60	Control	33	Female	0.424475	0.391477	0.125488	0.0339873	0.0245745
61	Control	15.4904	Female	0.308187	0.282257	0.209175	0.140095	0.0602873
62	Case	16.4384	Female	0.327558	0.350981	0.206056	0.0701341	0.04527
63	Control	19.4274	Female	0.270852	0.251249	0.317173	0.106666	0.0540582
64	Control	24.5945	Female	0.134428	0.09695	0.561696	0.136557	0.0703691
65	Control	26.6603	Female	0.112678	0.299729	0.323052	0.177776	0.086765
66	Case	44.463	Male	0.149912	0.206622	0.351961	0.192141	0.0993664
67	Case	1	Male	0.325807	0.244594	0.224421	0.144892	0.0602827
68	Case	45	Male	0.255668	0.32644	0.298619	0.0793705	0.0399023
69	Control	8	Male	0.16858	0.20822	0.342825	0.209105	0.0712718
70	Control	33.2247	Female	0.166545	0.189695	0.314956	0.231994	0.0968105
71	Control	24	Female	0.185426	0.364965	0.287375	0.107445	0.0547891
72	Case	24.0027	Male	0.348129	0.440065	0.110559	0.0692255	0.0320223
73	Case	1.24932	Female	0.412387	0.121471	0.310349	0.103686	0.0521082
74	Case	6.67397	Male	0.041415	0.194657	0.42649	0.232119	0.105319
75	Case	32.1288	Male	0.489692	0.0929568	0.234906	0.115112	0.0673345
76	Control	40	Female	0.103749	0.204042	0.337095	0.233826	0.121288
77	Case	45.6932	Female	0.210719	0.324657	0.262371	0.134866	0.0673841
78	Case	29.5726	Male	0.284745	0.296066	0.22533	0.13198	0.0618759
79	Control	36.0877	Female	0.396132	0.435121	0.102466	0.0467477	0.0195323
80	Control	35.6986	Female	0.33551	0.336493	0.179585	0.0996982	0.0487127
81	Case	29.2575	Female	0.290634	0.255665	0.301254	0.0889664	0.0634791
82	Case	22.3452	Male	0.17987	0.753947	0.040485	0.0173973	0.00830182
83	Case	45.3178	Female	0.171022	0.423775	0.232513	0.117026	0.0556632
84	Control	49.0685	Female	0.259849	0.468364	0.146737	0.078225	0.0468227
85	Control	40	Female	0.253136	0.691171	0.0296795	0.0149709	0.0110414
86	Control	25.1781	Female	0.159285	0.437637	0.248295	0.10353	0.0512518
87	Case	3	Male	0.377541	0.273364	0.21028	0.090605	0.0482118
88	Case	8	Male	0.33989	0.5154	0.0717764	0.0486373	0.024295
89	Control	18.3671	Male	0.189276	0.1934	0.469943	0.09596	0.0514218
90	Case	14.0767	Female	0.255349	0.312284	0.254967	0.11573	0.0616691
91	Case	39.5781	Male	0.215405	0.734567	0.0270664	0.0154277	0.00753545
92	Control	6	Male	0.3531	0.164941	0.322403	0.109222	0.0503327
93	Control	24.5918	Female	0.0573064	0.16091	0.400289	0.265519	0.115975
94	Control	13	Female	0.284617	0.221095	0.242217	0.169846	0.0822218
95	Control	22	Female	0.276195	0.448705	0.155184	0.0817195	0.0381959
96	Case	65.7397	Female	0.0787855	0.145984	0.28559	0.356092	0.133551
97	Case	20	Female	0.141661	0.401062	0.271599	0.110011	0.0756673
98	Case	37	Female	0.349619	0.241353	0.213282	0.142622	0.0531236
99	Control	54	Female	0.36215	0.134414	0.32168	0.119487	0.0622718
100	Case	43	Female	0.41979	0.225962	0.187171	0.105456	0.0616218
101	Case	41	Male	0.260867	0.19718	0.333041	0.144869	0.0640441
102	Case	22.2082	Male	0.323675	0.302078	0.217221	0.100209	0.0568164
103	Control	23	Male	0.292353	0.159097	0.339978	0.135678	0.0728968
104	Control	55.2411	Female	0.361623	0.215019	0.328124	0.0660736	0.0291586
105	Case	58.3123	Female	0.170049	0.238876	0.19947	0.264309	0.127297
106	Case	5	Female	0.294323	0.355788	0.198565	0.0996636	0.0516591
107	Control	39.3918	Male	0.123992	0.34798	0.353324	0.122571	0.0521341
108	Case	26.326	Female	0.432794	0.416921	0.0681655	0.0502391	0.0318823
109	Control	15.8301	Female	0.189529	0.503039	0.155204	0.0972818	0.0549464
110	Control	34	Female	0.139097	0.128678	0.438805	0.195555	0.0978655
111	Case	31	Male	0.573894	0.13418	0.173307	0.0793127	0.0393064
112	Control	24.5781	Female	0.29997	0.25584	0.227201	0.151779	0.0652091
113	Control	17.7288	Male	0.224882	0.273545	0.314585	0.112545	0.0744445
114	Case	4.40274	Female	0.443095	0.110425	0.295916	0.0978309	0.0527332
115	Case	27	Male	0.187601	0.213211	0.324772	0.199156	0.0752609
116	Control	68	Female	0.175524	0.421229	0.142591	0.169212	0.0914441
117	Case	20.2986	Female	0.199748	0.253187	0.371084	0.111966	0.0640155
118	Case	27	Female	0.0196855	0.11365	0.452026	0.314257	0.100384
119	Control	26.1973	Female	0.271302	0.326459	0.225312	0.125073	0.0518527
120	Case	0.70411	Male	0.336374	0.247945	0.237477	0.12562	0.0525814
121	Case	34	Female	0.259329	0.580241	0.0753177	0.0500827	0.0350305
122	Control	20.1068	Female	0.20219	0.627093	0.0925614	0.0575945	0.0205627
123	Control	33.2849	Female	0.292982	0.267763	0.324066	0.0814173	0.0337727
124	Control	29.2904	Female	0.141746	0.238059	0.375424	0.177584	0.0671864
125	Case	31	Male	0.201509	0.164613	0.36028	0.177968	0.0956323
126	Case	12.1726	Female	0.254783	0.416776	0.180921	0.103185	0.0443373
127	Case	39.1507	Male	0.278594	0.255863	0.233001	0.150391	0.0821505
128	Control	21.9233	Female	0.27072	0.342719	0.213016	0.122413	0.0511341
129	Control	61	Female	0.562117	0.118262	0.214327	0.069605	0.0356905
130	Control	26.5863	Female	0.388918	0.22511	0.289622	0.0638045	0.0325455
131	Case	1.45479	Female	0.342903	0.152135	0.316751	0.130311	0.0579023
132	Control	34	Male	0.361467	0.238355	0.269235	0.0833777	0.0475668
133	Case	40	Male	0.260768	0.2611	0.323344	0.0977136	0.0570777
134	Control	34	Male	0.366637	0.0892082	0.328481	0.141558	0.0741141
135	Case	27	Male	0.122622	0.234174	0.335774	0.2001	0.107331
136	Case	28.4877	Male	0.208281	0.746206	0.023115	0.01446	0.00793636
137	Case	45	Male	0.36134	0.36122	0.155436	0.0801732	0.0418318
138	Control	35.6822	Male	0.2996	0.241699	0.245635	0.150573	0.0624918
139	Control	33.5507	Male	0.21568	0.744749	0.0200623	0.0138145	0.00569318
140	Control	36.2932	Female	0.491195	0.28751	0.0939936	0.0882482	0.0390541
141	Control	31.2384	Female	0.303028	0.192803	0.287625	0.154187	0.0623577
142	Control	33	Female	0.458295	0.430564	0.0533486	0.0355714	0.0222214
143	Control	36.8082	Female	0.188866	0.282782	0.302678	0.16464	0.0610345
144	Control	3.39726	Female	0.230734	0.3756	0.23017	0.101748	0.0617459
145	Case	19.1589	Female	0.366478	0.302733	0.207825	0.0764236	0.0465414
146	Control	30.0521	Female	0.307199	0.207467	0.257271	0.158681	0.0693827
147	Case	39	Male	0.437805	0.260551	0.184455	0.0803132	0.0368755
148	Case	72.6055	Female	0.300881	0.251943	0.247471	0.150837	0.0488668
149	Case	20.0274	Male	0.137845	0.33485	0.267786	0.178039	0.08148
150	Case	0.816438	Male	0.394975	0.457362	0.0905586	0.0396818	0.0174214
151	Control	18	Female	0.244027	0.616823	0.0900123	0.0287827	0.0203536
152	Control	30.5096	Female	0.116662	0.24762	0.400549	0.15415	0.0810191
153	Case	53.6767	Male	0.121081	0.313649	0.267437	0.21497	0.0828609
154	Control	45.2466	Female	0.281684	0.384018	0.206155	0.0832364	0.0449077
155	Control	5	Male	0.231964	0.244507	0.315529	0.146823	0.0611782
156	Case	10.0219	Female	0.214684	0.741155	0.0236386	0.0132041	0.00731682
157	Control	29.9205	Female	0.493344	0.177484	0.192242	0.0967459	0.0401841
158	Case	54	Female	0.499469	0.162226	0.237772	0.0602182	0.040315
159	Case	54.5644	Female	0.368631	0.314986	0.143899	0.117783	0.0547018
160	Control	30	Female	0.06167	0.152719	0.469353	0.22894	0.0873173
161	Case	40	Male	0.280664	0.231225	0.280521	0.136271	0.0713155
162	Control	26.2247	Female	0.225	0.589308	0.0887495	0.0572018	0.03974
163	Control	33.263	Female	0.469275	0.44533	0.0514382	0.0206114	0.013345
164	Case	44.3068	Female	0.498555	0.177225	0.151208	0.119362	0.0536495
165	Control	35.4164	Female	0.347779	0.189567	0.295762	0.0962223	0.0706695
166	Control	31	Male	0.225441	0.143659	0.450112	0.11756	0.0632282
167	Control	23	Female	0.372998	0.526487	0.054635	0.0308782	0.0150014
168	Control	15.8932	Female	0.331876	0.136894	0.303764	0.146185	0.0812818
169	Case	15.589	Male	0.265415	0.29319	0.273095	0.10367	0.0646309
170	Control	33.6082	Female	0.319787	0.22239	0.254027	0.148944	0.05485
171	Case	57	Male	0.523724	0.226614	0.194915	0.0341655	0.0205814
172	Control	17.4822	Female	0.316796	0.302658	0.206961	0.111617	0.0619641
173	Control	25	Female	0.30853	0.50142	0.09524	0.0603627	0.0344482
174	Case	33	Female	0.60391	0.183577	0.138111	0.0510282	0.0233732
175	Case	39	Male	0.0925486	0.186337	0.3227	0.279359	0.119055
176	Case	26.7342	Male	0.221178	0.736774	0.0210341	0.01092	0.0100923
177	Control	4	Male	0.358365	0.157537	0.327323	0.0903059	0.0664695
178	Case	48	Male	0.34928	0.19125	0.274495	0.107726	0.0772495
179	Case	23.937	Male	0.232137	0.276747	0.233595	0.17083	0.0866895
180	Control	33	Male	0.241566	0.293176	0.192636	0.183641	0.0889809
181	Control	19.1315	Female	0.0604109	0.191742	0.517306	0.163422	0.0671177
182	Control	34.5781	Female	0.204087	0.140956	0.312303	0.264069	0.0785855
183	Case	15.7151	Female	0.231857	0.724877	0.0270836	0.00727091	0.00891136
184	Control	19.8301	Female	0.292602	0.234106	0.2423	0.159298	0.0716955
185	Control	18	Female	0.185033	0.161892	0.299923	0.25905	0.0941027
186	Case	26	Female	0.570072	0.338949	0.0748941	0.00980136	0.00628136
187	Control	27.0959	Female	0.15556	0.387185	0.292215	0.113199	0.0518405
188	Case	44.2493	Male	0.437645	0.1259	0.258954	0.116713	0.0607868
189	Control	18.8493	Female	0.372693	0.199851	0.250077	0.122139	0.0552391
190	Control	26.6356	Female	0.390265	0.194275	0.285226	0.084745	0.0454873
191	Case	26	Female	0.445697	0.405834	0.0756709	0.0468882	0.0259105
192	Case	0	Female	0.192592	0.707697	0.0412232	0.0385591	0.0199286
193	Case	1.09863	Female	0.426406	0.217748	0.164368	0.133562	0.0579173
194	Control	46.7068	Male	0.170579	0.706221	0.0712432	0.0286341	0.0233218
195	Case	38.1342	Female	0.20311	0.2023	0.388847	0.135656	0.0700873
196	Control	45.3507	Female	0.162179	0.803358	0.0129741	0.00944682	0.0120436
197	Control	19.0247	Male	0.228422	0.212989	0.299783	0.178505	0.0803005
198	Case	23	Male	0.1567	0.287546	0.343362	0.139335	0.0730568
199	Case	37	Female	0.493455	0.09982	0.269284	0.0966064	0.0408373
200	Control	22	Female	0.289229	0.214665	0.257135	0.165537	0.0734336
201	Control	21.7808	Female	0.22511	0.344629	0.245199	0.117723	0.06734
202	Case	15.3589	Female	0.278803	0.362853	0.186282	0.118603	0.0534591
203	Case	45	Female	0.368502	0.132299	0.265206	0.174626	0.0593664
204	Control	22.0219	Female	0.156761	0.214849	0.382495	0.158142	0.0877523
205	Case	43	Male	0.460968	0.0871905	0.31414	0.0882995	0.0494014
206	Case	39.8	Female	0.19152	0.165725	0.503847	0.0945514	0.0443568
207	Case	2	Female	0.249135	0.687846	0.0333495	0.0168359	0.0128336
208	Control	31	Female	0.137059	0.199731	0.499995	0.0973686	0.0658464
209	Control	26.3863	Female	0.19087	0.631323	0.0877718	0.0625873	0.0274491
210	Control	24	Female	0.336155	0.183508	0.259996	0.151746	0.0685923
211	Control	32	Female	0.296323	0.160152	0.35883	0.116458	0.0682382
212	Case	26.6849	Male	0.174449	0.41867	0.225907	0.125494	0.0554832
213	Case	18.9288	Female	0.226602	0.312498	0.227989	0.156004	0.0769064
214	Control	22.8411	Female	0.346349	0.276661	0.155767	0.148533	0.0726864
215	Control	28.9233	Female	0.416353	0.0409705	0.439683	0.0603323	0.0426609
216	Control	37.8466	Female	0.177437	0.255936	0.25589	0.210049	0.100689
217	Case	3.96164	Female	0.372305	0.251566	0.267554	0.06647	0.042105
218	Control	34	Male	0.23578	0.0965782	0.355637	0.211176	0.100832
219	Control	42	Male	0.0982441	0.233782	0.34654	0.207139	0.114296
220	Control	26	Female	0.404926	0.163804	0.28605	0.091125	0.054095
221	Control	18.9068	Female	0.20261	0.526101	0.15037	0.0835995	0.0373195
222	Control	41	Male	0.282612	0.253244	0.25644	0.153215	0.05449
223	Control	5.14521	Male	0.375466	0.284716	0.183405	0.11619	0.0402241
224	Case	41.1945	Male	0.112197	0.252576	0.345264	0.186243	0.103721
225	Case	16.6849	Male	0.314525	0.385605	0.153563	0.0954136	0.0508918
226	Control	20.4301	Female	0.246913	0.208166	0.367504	0.11412	0.0632964
227	Case	34.8521	Male	0.202516	0.120891	0.384269	0.19547	0.0968545
228	Control	43.3534	Female	0.0962636	0.515656	0.184417	0.13755	0.0661118
229	Case	30.8685	Male	0.309835	0.0424009	0.525645	0.0802655	0.0418536
230	Control	23	Male	0.252904	0.167829	0.398504	0.125597	0.0551664
231	Control	2	Male	0.199135	0.383896	0.214865	0.135058	0.0670468
232	Control	31.6301	Female	0.27083	0.120636	0.424555	0.126081	0.0579014
233	Case	31	Male	0.227702	0.404353	0.180565	0.138064	0.0493123
234	Control	34.6247	Male	0.160722	0.149052	0.45258	0.174075	0.0635718
235	Control	4.87671	Male	0.407111	0.0747409	0.349289	0.120862	0.0479977
236	Control	15.3918	Female	0.25793	0.36843	0.180686	0.139624	0.0533318
237	Case	45	Female	0.538639	0.183973	0.147295	0.087575	0.0425195
238	Case	43.4411	Female	0.263889	0.51741	0.134505	0.0500518	0.0341436
239	Control	23	Female	0.204366	0.146593	0.460566	0.125208	0.0632682
240	Control	33.0822	Female	0.311771	0.0805518	0.469137	0.0914968	0.0470423
241	Control	27	Female	0.175419	0.261846	0.357925	0.137341	0.0674705
242	Case	41.7644	Female	0.490809	0.175958	0.147595	0.143655	0.0419845
243	Control	48.1096	Female	0.768318	0.0920368	0.0761645	0.0427195	0.0207609
244	Control	31.5562	Female	0.17049	0.138355	0.34402	0.237305	0.10983
245	Control	35	Female	0.177335	0.26069	0.293087	0.181936	0.0869532
246	Control	74.8055	Female	0.11057	0.582852	0.134995	0.115631	0.0559518
247	Case	50	Female	0.237863	0.354685	0.269943	0.0909168	0.0465927
248	Case	33.5534	Female	0.285992	0.217645	0.255603	0.174892	0.0658709
249	Case	38	Female	0.345275	0.110554	0.379899	0.10381	0.06046
250	Control	30.9068	Female	0.261024	0.214885	0.264873	0.193148	0.0660723
251	Case	34	Male	0.496331	0.0705982	0.273494	0.106315	0.0532591
252	Case	21	Female	0.32457	0.207514	0.262383	0.130294	0.0752368
253	Control	18	Female	0.05628	0.311229	0.269895	0.243073	0.119522
254	Control	45	Female	0.371217	0.418614	0.14559	0.041535	0.0230459
255	Case	31	Male	0.58371	0.201456	0.0947486	0.0850677	0.0350168
256	Control	37.6904	Female	0.122468	0.0914959	0.651837	0.0848814	0.0493173
257	Case	43	Male	0.157417	0.333635	0.241115	0.189697	0.0781359
258	Control	36.7726	Female	0.310031	0.257143	0.308908	0.0875236	0.0363918
259	Case	30	Male	0.101153	0.683263	0.135468	0.0454382	0.0346809
260	Case	6.05753	Female	0.402608	0.169135	0.234117	0.124802	0.069335
261	Case	26	Female	0.180788	0.41033	0.21252	0.1373	0.0590627
262	Control	40	Female	0.151401	0.202845	0.437219	0.156334	0.0522
263	Case	24.5589	Male	0.282323	0.143334	0.392957	0.107755	0.0736295
264	Control	25	Female	0.241613	0.547572	0.0971836	0.073555	0.0400755
265	Control	2.45479	Female	0.249982	0.469559	0.12916	0.101325	0.0499727
266	Control	51.3397	Male	0.114947	0.0995114	0.483473	0.211805	0.0902623
267	Control	31.6795	Male	0.276742	0.196169	0.410325	0.0690623	0.0477036
268	Case	19	Female	0.4901	0.308369	0.124495	0.0529141	0.0241209
269	Control	14.1836	Male	0.469105	0.166444	0.235397	0.0903277	0.0387268
270	Case	5	Male	0.297843	0.343469	0.135884	0.168754	0.0540518
271	Case	36	Male	0.103155	0.862688	0.0178268	0.00830864	0.00802409
272	Case	1	Female	0.38173	0.339195	0.146834	0.0814145	0.0508255
273	Control	35.2849	Male	0.107089	0.207424	0.428124	0.176065	0.0812982
274	Control	62	Male	0.0942632	0.20404	0.383599	0.233048	0.08505
275	Control	44.5096	Female	0.153385	0.168286	0.394272	0.19502	0.0890364
276	Case	2.68219	Female	0.210723	0.747811	0.0212577	0.0118327	0.00837591
277	Case	69.7781	Female	0.117682	0.0710327	0.569064	0.166478	0.0757427
278	Control	39	Female	0.255215	0.226508	0.31814	0.133544	0.0665932
279	Control	34.6521	Female	0.167385	0.352907	0.245897	0.16496	0.0688523
280	Control	37.2575	Female	0.110051	0.257287	0.390512	0.175179	0.06697
281	Case	33.6795	Female	0.337664	0.0975423	0.356491	0.129154	0.0791509
282	Control	38.8877	Female	0.11417	0.132751	0.494294	0.172924	0.0858623
283	Case	30	Male	0.0176195	0.956406	0.00759773	0.00916773	0.00920864
284	Case	19.0986	Female	0.406706	0.308235	0.193788	0.0554759	0.0357973
285	Case	32.1644	Male	0.179477	0.778385	0.0236636	0.0106636	0.00780864
286	Control	52	Female	0.133163	0.145653	0.47055	0.166731	0.0839009
287	Control	28.4767	Female	0.0458832	0.0631068	0.358983	0.376135	0.155892
288	Case	50	Female	0.353898	0.0933409	0.339555	0.149445	0.0637605
289	Control	46.8384	Female	0.0875927	0.204174	0.379826	0.226493	0.101916
290	Case	40	Male	0.441035	0.348527	0.172169	0.0236886	0.0145818
291	Control	25.2575	Female	0.200232	0.406442	0.197831	0.12839	0.0671045
292	Case	39	Male	0.561696	0.362123	0.0481814	0.0165564	0.0114445
293	Control	45.8932	Female	0.131944	0.237374	0.384801	0.171431	0.0744495
294	Case	37.5863	Female	0.456147	0.376164	0.105803	0.0386586	0.0232264
295	Case	56.8877	Male	0.395624	0.226889	0.227193	0.100532	0.0497605
296	Control	32.4904	Female	0.214042	0.197161	0.306516	0.205863	0.0764182
297	Case	65.2849	Female	0.34113	0.126927	0.407987	0.0850082	0.0389464
298	Control	22	Male	0.252421	0.354348	0.243252	0.107626	0.0423518
299	Case	33	Male	0.420719	0.240732	0.184621	0.110683	0.0432464
300	Case	32.4329	Male	0.270279	0.448705	0.147903	0.0922514	0.0408609
301	Case	36.4384	Female	0.326869	0.0521941	0.447241	0.110158	0.0635377
302	Control	29.7973	Male	0.157566	0.14187	0.488631	0.13835	0.0735823
303	Case	16.3863	Male	0.296699	0.291553	0.236604	0.134241	0.0409059
304	Control	33.737	Male	0.279535	0.178713	0.388042	0.0950959	0.0586118
305	Control	33	Female	0.106852	0.241119	0.271594	0.269548	0.110885
306	Control	14	Male	0.33952	0.27605	0.22953	0.112178	0.0427223
307	Control	40.9315	Male	0.0807973	0.150434	0.489602	0.186415	0.0927523
308	Case	9.09315	Female	0.367938	0.512002	0.0756227	0.03046	0.0139764
309	Case	5.09315	Male	0.275967	0.54545	0.111563	0.0448282	0.0221905
310	Control	26	Female	0.484823	0.283195	0.119592	0.0741986	0.0381905
311	Case	54.8247	Male	0.22562	0.72879	0.021245	0.0122082	0.0121368
312	Case	2	Male	0.394466	0.158243	0.331977	0.0839568	0.0313568
313	Case	36.1014	Male	0.412533	0.175621	0.236444	0.120552	0.0548523
314	Control	50	Female	0.353584	0.132992	0.324335	0.134312	0.0547768
315	Case	20.2575	Female	0.268615	0.203716	0.321549	0.133772	0.0723477
316	Case	54.6164	Female	0.00486591	0.01499	0.474104	0.399627	0.106411
317	Control	34.7452	Female	0.156944	0.1737	0.277149	0.267578	0.124631
318	Control	6	Male	0.384939	0.28824	0.128782	0.132875	0.0651627
319	Control	23.8356	Female	0.358229	0.137476	0.291913	0.15044	0.0619427
320	Control	27.726	Female	0.0749859	0.216536	0.309713	0.259475	0.13929
321	Control	13	Female	0.218659	0.419391	0.17246	0.129336	0.0601532
322	Case	4.97808	Male	0.362175	0.340869	0.161021	0.0743027	0.0616327
323	Control	51.0247	Male	0.0719786	0.0883805	0.592147	0.167407	0.0800864
324	Case	31	Male	0.169191	0.1652	0.413685	0.182517	0.0694091
325	Control	31.9534	Female	0.287757	0.532162	0.0852814	0.0591977	0.0356027
326	Case	39	Male	0.202179	0.29368	0.210173	0.21219	0.0817786
327	Case	28.6795	Male	0.352635	0.317487	0.166943	0.0995918	0.0633436
328	Case	35.1973	Female	0.243379	0.399044	0.199143	0.113039	0.0453941
329	Case	45	Male	0.139031	0.634466	0.13755	0.0493227	0.0396318
330	Control	26.7836	Male	0.330512	0.129311	0.419605	0.0752427	0.0453259
331	Case	16.0603	Female	0.393151	0.216392	0.267834	0.0906832	0.0319405
332	Control	32	Female	0.410394	0.318434	0.149043	0.0780918	0.0440336
333	Case	26.0986	Male	0.464151	0.232139	0.215201	0.0572832	0.0312268
334	Case	7	Female	0.351507	0.206886	0.284664	0.0958527	0.0610927
335	Control	23	Female	0.248361	0.249065	0.280698	0.163045	0.05883
336	Control	26.4521	Female	0.328521	0.243474	0.201127	0.16542	0.0614564
337	Control	20	Female	0.368834	0.398724	0.143073	0.0598132	0.0295586
338	Case	32.7918	Female	0.182881	0.144772	0.425485	0.160861	0.0860009
339	Case	25.2795	Female	0.200987	0.747794	0.0256291	0.0180345	0.00755455
340	Control	53	Female	0.319825	0.152449	0.334577	0.118235	0.0749127
341	Control	25	Male	0.0824918	0.158036	0.517033	0.153572	0.088865
342	Control	40	Female	0.314554	0.215204	0.28961	0.111712	0.06892
343	Case	7	Female	0.354454	0.199335	0.231045	0.149904	0.0652614
344	Control	27.7973	Female	0.307083	0.259795	0.216667	0.14099	0.0754655
345	Control	13	Female	0.174883	0.258474	0.26661	0.216197	0.0838359
346	Case	37.463	Male	0.179643	0.2934	0.250191	0.178246	0.0985209
347	Control	28	Female	0.205903	0.287448	0.27161	0.163746	0.0712918
348	Control	33	Female	0.363549	0.419056	0.120076	0.0676918	0.0296282
349	Control	17	Female	0.347627	0.233223	0.244391	0.102687	0.0720718
350	Case	18	Female	0.257047	0.171794	0.38461	0.110012	0.0765345
351	Control	22.3616	Female	0.50853	0.0840414	0.24005	0.11744	0.0499377
352	Control	44.7041	Female	0.351086	0.201543	0.266141	0.12178	0.0594455
353	Case	47	Male	0.27479	0.14944	0.385421	0.132358	0.0579891
354	Control	32.4411	Male	0.196098	0.192954	0.338118	0.195207	0.0776223
355	Control	9	Male	0.13754	0.248369	0.34258	0.197529	0.0739836
356	Case	32.6795	Female	0.27385	0.293186	0.1643	0.190455	0.0782114
357	Case	42.0932	Male	0.246905	0.712726	0.0206	0.0105809	0.00918864
358	Control	24	Female	0.269492	0.212287	0.331577	0.123291	0.0633518
359	Case	28	Male	0.323607	0.570285	0.0658473	0.0269145	0.0133473
360	Control	25	Male	0.187375	0.332187	0.279319	0.143605	0.0575145
361	Case	28.7178	Male	0.18333	0.77776	0.0201905	0.0138841	0.00483636
362	Case	31.6411	Male	0.270455	0.208157	0.250576	0.192338	0.0784741
363	Control	34	Male	0.289406	0.182751	0.276965	0.159397	0.0914818
364	Control	23.474	Male	0.438437	0.181823	0.231536	0.0943005	0.0539041
365	Case	36.0849	Female	0.0652382	0.487029	0.19332	0.171392	0.0830232
366	Control	40.6959	Male	0.174793	0.201732	0.277196	0.223532	0.122746
367	Control	40.9589	Female	0.292004	0.125816	0.346591	0.17422	0.0613668
368	Control	35.5644	Female	0.290461	0.130896	0.351041	0.157915	0.0696855
369	Control	38	Female	0.281287	0.327902	0.323651	0.0442555	0.0229027
370	Case	35	Male	0.54899	0.252286	0.146064	0.0340859	0.018575
371	Control	15.1945	Female	0.281525	0.22687	0.404598	0.0493891	0.0376182
372	Control	44.5836	Female	0.298993	0.287829	0.22594	0.132268	0.0549682
373	Case	25.3315	Male	0.132638	0.253895	0.462465	0.101385	0.0496164
374	Case	52.9562	Male	0.158415	0.241835	0.381123	0.135926	0.0827014
375	Control	49	Female	0.366149	0.377302	0.170106	0.0534214	0.0330218
376	Case	45.7096	Female	0.370106	0.290723	0.21582	0.0943295	0.0290209
377	Control	37.2219	Female	0.189621	0.218729	0.38781	0.138426	0.0654132
378	Control	25.1507	Male	0.301102	0.285409	0.268605	0.0915782	0.0533032
379	Case	52	Male	0.211302	0.290163	0.209605	0.179489	0.109439
380	Case	3	Female	0.46362	0.121606	0.257494	0.105368	0.0519114
381	Control	20.0877	Female	0.311965	0.362481	0.17667	0.10913	0.0397536
382	Case	36	Male	0.244861	0.472321	0.19772	0.0584036	0.0266955
383	Control	30	Female	0.290889	0.327868	0.221108	0.10871	0.0514259
384	Control	36.8274	Female	0.148953	0.101554	0.540537	0.141431	0.0675236
385	Case	43	Male	0.136916	0.466801	0.137353	0.168208	0.0907223
386	Case	38.8164	Female	0.330525	0.13722	0.323937	0.134441	0.0738759
387	Control	18.9534	Female	0.367588	0.0384964	0.464797	0.0848991	0.0442205
388	Control	40.1699	Female	0.0850282	0.10277	0.536412	0.179708	0.0960823
389	Control	28.7178	Female	0.240827	0.566523	0.113543	0.0484345	0.0306741
390	Case	49	Male	0.303668	0.235853	0.353179	0.0671764	0.0401241
391	Case	24	Male	0.462032	0.136436	0.245683	0.107074	0.0487745
392	Control	24	Male	0.335647	0.196378	0.256834	0.14417	0.06697
393	Case	29	Male	0.249226	0.675952	0.0472736	0.01684	0.0107091
394	Case	30.5808	Female	0.236314	0.577315	0.0833818	0.0741286	0.0288614
395	Case	36.3699	Female	0.403257	0.155705	0.270984	0.113004	0.0570486
396	Control	22.2521	Female	0.260189	0.283483	0.296193	0.116992	0.043145
397	Case	10	Female	0.214396	0.221511	0.346174	0.138977	0.0789432
398	Case	67.8575	Female	0.200875	0.0508132	0.582425	0.105304	0.0605832
399	Control	21.0548	Male	0.30135	0.466756	0.113266	0.0865659	0.0320618
400	Control	36.0329	Male	0.06886	0.331074	0.36216	0.167056	0.0708514
401	Case	37	Male	0.324006	0.288686	0.268503	0.0697377	0.0490655
402	Case	2	Female	0.234597	0.15938	0.350106	0.172186	0.0837341
403	Control	36	Female	0.168616	0.236465	0.313156	0.187748	0.0940159
404	Case	2	Female	0.18161	0.777966	0.0184909	0.0114259	0.0105059
405	Case	43	Female	0.658444	0.14412	0.144438	0.0337036	0.019295
406	Case	46	Male	0.192447	0.413069	0.239178	0.102048	0.0532568
407	Control	45	Female	0.211772	0.37795	0.202384	0.13649	0.0714059
408	Control	24	Female	0.414754	0.168439	0.295652	0.0890364	0.0321177
409	Control	20	Male	0.175851	0.29201	0.337031	0.143495	0.0516132
410	Control	5	Male	0.23107	0.363177	0.193874	0.147443	0.0644359
411	Case	34	Male	0.261806	0.236864	0.277356	0.149404	0.0745686
412	Control	20.5452	Male	0.231308	0.249739	0.377652	0.100674	0.040625
413	Control	78	Male	0.242643	0.214803	0.335978	0.12693	0.0796459
414	Control	42.126	Female	0.205046	0.713812	0.0312986	0.0279005	0.0219436
415	Control	21.4877	Female	0.42907	0.402891	0.112109	0.0297491	0.0261823
416	Control	33.8219	Female	0.281687	0.491684	0.121223	0.0689332	0.0364723
417	Case	34	Female	0.153991	0.225854	0.278587	0.219683	0.121888
418	Case	36.9945	Male	0.532187	0.142503	0.200908	0.0837759	0.0406259
419	Case	33	Female	0.0911977	0.146765	0.470025	0.197539	0.0944714
420	Case	60.6274	Female	0.258284	0.170395	0.3643	0.146173	0.0608482
421	Case	28	Male	0.53631	0.0965827	0.241557	0.0792214	0.0463273
422	Case	53	Male	0.28785	0.371747	0.200624	0.0995636	0.0402168
423	Case	2.58904	Female	0.285469	0.146278	0.402716	0.110786	0.0547482
424	Case	39	Female	0.438064	0.372074	0.0864077	0.0774564	0.0259982
425	Control	20	Female	0.0258368	0.173945	0.376096	0.313613	0.110505
426	Control	34.9096	Female	0.283795	0.305342	0.229753	0.12798	0.0531273
427	Case	11.8712	Male	0.490774	0.306772	0.104038	0.0710168	0.0273977
428	Control	52	Female	0.246783	0.305704	0.203834	0.153382	0.0902982
429	Case	38	Male	0.477223	0.157433	0.261515	0.0678686	0.03596
430	Case	29.4438	Male	0.322213	0.298001	0.2115	0.112311	0.0559759
431	Control	20.5945	Female	0.343572	0.303178	0.204447	0.10494	0.0438627
432	Case	36.5233	Female	0.0622036	0.119991	0.47458	0.239909	0.103315
433	Control	16	Male	0.214287	0.30363	0.263823	0.149711	0.0685491
434	Control	30.9205	Female	0.0651836	0.107422	0.51235	0.214451	0.100593
435	Control	25.2932	Female	0.301248	0.263666	0.234573	0.136889	0.0636255
436	Control	50.6849	Female	0.600491	0.0529473	0.249649	0.0672082	0.029705
437	Control	27.3096	Female	0.157205	0.377614	0.251443	0.146174	0.0675659
438	Case	42.0027	Male	0.500929	0.271118	0.123889	0.07028	0.0337859
439	Control	32.5808	Female	0.23444	0.278698	0.218648	0.174928	0.0932859
440	Case	28	Female	0.338727	0.280636	0.215234	0.117641	0.0477632
441	Case	24.5507	Female	0.28376	0.566792	0.0585241	0.0619955	0.0289282
442	Case	26	Male	0.216324	0.104859	0.41029	0.191046	0.0774805
443	Case	0.852055	Male	0.200361	0.160337	0.381615	0.175975	0.0817118
444	Control	34.5562	Male	0.183302	0.342773	0.225809	0.178056	0.0700623
445	Control	25	Male	0.12323	0.240068	0.383574	0.190719	0.0624091
446	Case	24	Male	0.140159	0.329707	0.372637	0.10373	0.053765
447	Case	20	Male	0.362199	0.0610091	0.4476	0.0776795	0.0515123
448	Control	57.2603	Male	0.175613	0.252255	0.269248	0.177663	0.12522
449	Case	13.0849	Female	0.208811	0.747587	0.0250723	0.0100832	0.00844773
450	Control	35.4329	Female	0.0562386	0.40261	0.30906	0.150439	0.0816523
451	Control	18.0356	Female	0.144901	0.419154	0.251873	0.138155	0.0459168
452	Control	21	Male	0.15732	0.214337	0.390054	0.157153	0.0811355
453	Case	69	Male	0.45017	0.498924	0.0314768	0.01086	0.00856955
454	Control	35.4658	Female	0.157695	0.161131	0.378323	0.205973	0.0968759
455	Control	37	Male	0.373705	0.428379	0.157372	0.0259323	0.0146118
456	Case	18.1205	Female	0.3553	0.220829	0.190998	0.143683	0.08919
457	Case	1.15342	Male	0.197125	0.416595	0.159039	0.164833	0.0624055
458	Case	42.1726	Female	0.44714	0.392308	0.08328	0.0551823	0.0220895
459	Control	27	Female	0.13816	0.300146	0.360171	0.127173	0.0743505
460	Case	31	Male	0.557001	0.204283	0.16707	0.0507018	0.0209441
461	Case	16.4274	Male	0.283646	0.576052	0.0912959	0.0313991	0.0176068
462	Control	24.6	Female	0.315593	0.255854	0.229115	0.137728	0.0617123
463	Case	41	Male	0.482359	0.117062	0.219337	0.114278	0.066965
464	Case	28	Male	0.212068	0.318978	0.341447	0.0916418	0.0358664
465	Case	2	Male	0.44378	0.183885	0.253696	0.0698341	0.0488073
466	Control	39	Female	0.350709	0.310564	0.182758	0.108659	0.0473105
467	Case	20.9918	Male	0.245846	0.53021	0.13102	0.0588409	0.0340841
468	Control	30.2795	Female	0.120088	0.0639718	0.506666	0.214015	0.0952568
469	Case	34	Female	0.23985	0.646543	0.0638109	0.0356414	0.0141559
470	Case	35.8384	Male	0.173201	0.794337	0.0131409	0.0114514	0.00786773
471	Control	30.463	Female	0.227437	0.172755	0.405003	0.134064	0.0607432
472	Case	22.5616	Female	0.161605	0.808063	0.0119659	0.0125159	0.00585045
473	Control	26.4548	Female	0.382623	0.129179	0.348047	0.093495	0.0466541
474	Control	18	Male	0.152966	0.194789	0.359743	0.2016	0.0909014
475	Case	27	Female	0.421509	0.266587	0.177313	0.09165	0.0429405
476	Control	32	Female	0.326534	0.269189	0.260098	0.100327	0.0438514
477	Control	32.5425	Female	0.465396	0.0925518	0.327247	0.0805955	0.0342105
478	Case	0.410959	Male	0.22883	0.712807	0.0322323	0.0184832	0.00764636
479	Case	33	Female	0.512664	0.359164	0.0627005	0.0409091	0.0245614
480	Control	41	Female	0.271064	0.133403	0.375607	0.1345	0.085425
481	Case	58	Female	0.268029	0.310315	0.186116	0.152556	0.0829855
482	Control	41	Female	0.226243	0.242947	0.307822	0.150091	0.0728982
483	Control	42	Male	0.308091	0.235055	0.285464	0.113854	0.0575341
484	Case	58	Male	0.335253	0.162707	0.313854	0.12637	0.061815
485	Control	37	Female	0.260245	0.6818	0.0351332	0.0108823	0.0119395
486	Control	39	Female	0.272043	0.437012	0.16298	0.09282	0.0351436
487	Control	55	Female	0.195202	0.222641	0.268198	0.198795	0.115163
488	Case	58	Male	0.156287	0.160775	0.338985	0.23774	0.106213
489	Control	34	Female	0.403705	0.289608	0.188342	0.0691391	0.0492077
490	Control	59	Male	0.177716	0.312889	0.251124	0.159995	0.0982736
491	Case	41	Female	0.34547	0.162213	0.302083	0.127902	0.0623314
492	Control	58	Female	0.543571	0.318645	0.104378	0.0202945	0.0131132
493	Control	34	Female	0.198442	0.230156	0.294157	0.172953	0.104295
494	Control	51	Female	0.148773	0.26184	0.291881	0.192333	0.105173
495	Control	52	Female	0.165064	0.286595	0.300521	0.169701	0.0781164
496	Control	37	Male	0.2808	0.447561	0.11108	0.110034	0.0505245
497	Control	38	Male	0.0873541	0.796665	0.0639659	0.0342014	0.017815
498	Control	37	Male	0.17511	0.219252	0.386239	0.14543	0.0739691
499	Case	56	Female	0.625281	0.108708	0.201161	0.0376318	0.0272173
500	Control	55	Female	0.144719	0.275374	0.341441	0.14205	0.0964164
501	Case	52	Female	0.524714	0.117315	0.204354	0.0928359	0.0607805
502	Control	43	Female	0.251047	0.57401	0.0784036	0.0649414	0.0316
503	Case	49	Female	0.313328	0.561161	0.0596318	0.034345	0.0315332
504	Case	46	Female	0.304517	0.148362	0.276551	0.190706	0.0798609
505	Control	52	Female	0.409422	0.0990609	0.290269	0.136001	0.0652509
506	Control	48	Male	0.410212	0.234135	0.181304	0.10573	0.0686227
507	Case	58	Female	0.325591	0.176183	0.229274	0.176988	0.0919641
508	Case	45	Female	0.136584	0.180476	0.414325	0.186296	0.0823182
509	Case	61	Male	0.0592264	0.189578	0.394047	0.238787	0.118361
510	Control	56	Female	0.117223	0.142205	0.386975	0.271455	0.0821423
511	Control	37	Female	0.0732845	0.422681	0.223336	0.183216	0.0974832
512	Control	49	Male	0.191045	0.0866741	0.490682	0.146148	0.0854505
513	Control	32	Female	0.413187	0.202048	0.191065	0.121155	0.0725436
514	Case	61	Female	0.350563	0.497691	0.0658414	0.054065	0.03184
515	Control	55	Female	0.568201	0.220632	0.111797	0.0670236	0.0323477
516	Case	51	Male	0.205512	0.370594	0.28181	0.0840391	0.0580455
517	Case	56	Female	0.30801	0.36556	0.20271	0.0814441	0.0422777
518	Control	45	Female	0.252082	0.266524	0.193074	0.19725	0.0910705
519	Case	35	Female	0.215447	0.387862	0.181419	0.14028	0.0749909
520	Control	57	Female	0.3195	0.503535	0.0911695	0.0570109	0.0287845
521	Control	47	Female	0.301358	0.399945	0.165099	0.0721414	0.0614577
522	Control	55	Female	0.232362	0.187644	0.371024	0.127885	0.0810859
523	Case	57	Female	0.276156	0.222524	0.261666	0.160065	0.0795895
524	Control	58	Female	0.227775	0.480836	0.125382	0.10669	0.0593164
525	Control	58	Female	0.317086	0.193486	0.25441	0.152796	0.0822214
526	Control	53	Female	0.323921	0.295975	0.191024	0.13385	0.0552291
527	Control	53	Female	0.390072	0.195525	0.244715	0.100779	0.0689095
528	Case	52	Female	0.451702	0.269925	0.178604	0.0681686	0.0316
529	Control	56	Female	0.384188	0.557063	0.0319909	0.0147082	0.0120495
530	Case	56	Female	0.316415	0.223329	0.236873	0.146325	0.0770582
531	Control	55	Female	0.393738	0.187902	0.280689	0.0918977	0.0457741
532	Control	53	Female	0.250604	0.290414	0.24465	0.153425	0.0609059
533	Control	53	Female	0.451694	0.230183	0.141895	0.115571	0.060655
534	Case	43	Male	0.297988	0.165813	0.335579	0.143006	0.0576159
535	Case	43	Female	0.398035	0.501038	0.0751514	0.0135268	0.0122468
536	Case	25	Female	0.192074	0.604781	0.14319	0.0392618	0.0206945
537	Case	28	Male	0.349501	0.12944	0.34414	0.121034	0.0558841
538	Control	27	Male	0.149356	0.400462	0.254045	0.138537	0.0576
539	Control	51	Male	0.355707	0.26618	0.23288	0.0871605	0.0580732
540	Control	36	Male	0.26654	0.258812	0.254866	0.132927	0.0868545
541	Case	24	Male	0.194732	0.282461	0.332403	0.113655	0.0767477
542	Control	29	Male	0.352634	0.379525	0.125881	0.0854318	0.0565305
543	Control	43	Male	0.177139	0.271968	0.35182	0.128189	0.070885
544	Control	39	Female	0.229242	0.451177	0.195125	0.0734486	0.0510077
545	Control	55	Female	0.263778	0.25562	0.23812	0.17301	0.0694718
546	Control	29	Female	0.195038	0.569517	0.14884	0.0537173	0.0328868
547	Control	40	Male	0.420601	0.367899	0.137965	0.0501195	0.0234155
548	Control	32	Female	0.21992	0.179568	0.404665	0.123084	0.0727645
549	Control	42	Female	0.228295	0.699018	0.0331759	0.0288409	0.0106709
550	Control	30	Female	0.363246	0.252264	0.215051	0.109325	0.0601127
551	Control	56	Male	0.289822	0.630639	0.0399527	0.0247191	0.0148655
552	Control	23	Male	0.22912	0.174118	0.39498	0.151947	0.0498341
553	Control	45	Male	0.219449	0.248288	0.328148	0.138806	0.0653091
554	Control	36	Female	0.216034	0.157574	0.41565	0.142385	0.0683568
555	Control	30	Female	0.247746	0.170999	0.345966	0.156397	0.0788918
556	Control	50	Female	0.401832	0.240899	0.179828	0.123844	0.0535982
557	Control	38	Female	0.213579	0.745085	0.0213027	0.00826091	0.0117723
558	Control	32	Male	0.193218	0.193608	0.389989	0.147971	0.0752132
559	Control	21	Female	0.124823	0.501259	0.184515	0.131722	0.0576809
560	Control	18	Male	0.235744	0.24299	0.342957	0.11779	0.0605186
561	Control	44	Male	0.323569	0.270731	0.252639	0.112521	0.04054
562	Control	52	Male	0.14442	0.819585	0.0195214	0.008565	0.00791136
563	Control	45	Female	0.388883	0.262502	0.182356	0.103421	0.0628373
564	Control	42	Female	0.27523	0.134233	0.356195	0.153713	0.0806277
565	Control	53	Female	0.458459	0.297838	0.181713	0.0409632	0.0210282
566	Control	63	Female	0.585092	0.0924718	0.227365	0.0592373	0.0358341
567	Control	21	Female	0.291078	0.228195	0.277958	0.13448	0.0682891
568	Control	36	Male	0.209382	0.137934	0.316752	0.229102	0.10683
569	Control	30	Male	0.28768	0.280693	0.298564	0.09017	0.0428955
570	Control	37	Male	0.242025	0.422968	0.1611	0.116531	0.0573768
571	Control	34	Male	0.065935	0.0608155	0.581129	0.19451	0.0976105
572	Control	27	Male	0.225842	0.177557	0.350604	0.155818	0.0901782
573	Control	23	Male	0.349157	0.381621	0.146779	0.0773368	0.0451082
574	Control	24	Female	0.391733	0.360932	0.150356	0.0631382	0.0338391
575	Control	29	Female	0.170318	0.214528	0.324468	0.221575	0.0691105
576	Control	50	Female	0.296447	0.251142	0.221877	0.150316	0.0802173
577	Control	41	Male	0.11274	0.15608	0.431716	0.201662	0.0978023
578	Control	26	Female	0.26313	0.0833973	0.484208	0.109059	0.0602077
579	Control	50	Female	0.161185	0.22652	0.321053	0.193955	0.09729
580	Control	27	Female	0.297614	0.337478	0.205537	0.111026	0.0483464
581	Control	50	Female	0.273511	0.511465	0.0946923	0.0777205	0.0426095
582	Control	42	Female	0.581061	0.283434	0.080245	0.0302905	0.0249709
583	Case	29	Female	0.311337	0.251617	0.181728	0.16904	0.0862782
584	Case	22	Female	0.205485	0.273358	0.247157	0.185955	0.088045
585	Control	55	Male	0.0932023	0.163527	0.467461	0.192335	0.0834759
586	Control	23	Female	0.404464	0.301976	0.165087	0.08386	0.0446123
587	Control	28	Female	0.220003	0.741751	0.0168877	0.0108727	0.0104836
588	Control	47	Female	0.422335	0.259578	0.157995	0.117228	0.0428636
589	Control	44	Female	0.211138	0.227097	0.345746	0.124657	0.0913627
590	Control	66	Female	0.203016	0.327605	0.217412	0.161366	0.0906009
591	Control	31	Female	0.17518	0.276352	0.360842	0.117691	0.0699345
592	Control	31	Female	0.111931	0.46302	0.228232	0.131224	0.0655927
593	Control	30	Female	0.283915	0.495544	0.0915614	0.0785159	0.0504641
594	Control	22	Male	0.304374	0.253415	0.256855	0.125565	0.0597877
595	Control	23	Female	0.456355	0.199749	0.221911	0.0808605	0.0411273
596	Control	57	Male	0.39232	0.363014	0.150814	0.0635491	0.0303032
597	Control	24	Female	0.42212	0.418527	0.0882564	0.0493668	0.0217305
598	Control	45	Male	0.161293	0.133578	0.449712	0.152762	0.102656
599	Control	18	Male	0.298726	0.177015	0.257225	0.171325	0.0957082
600	Control	19	Female	0.142724	0.152395	0.471288	0.158798	0.0747955
601	Control	57	Female	0.139891	0.357348	0.232622	0.181346	0.0887909
602	Case	53	Male	0.269976	0.217901	0.29438	0.147388	0.0703541
603	Control	33	Female	0.303943	0.355267	0.182721	0.109838	0.0482295
604	Control	49	Male	0.0155086	0.0231941	0.854667	0.0564927	0.0501359
605	Case	24	Male	0.190422	0.386739	0.252977	0.12191	0.0479532
606	Case	25	Male	0.28043	0.327261	0.211582	0.126567	0.0541591
607	Case	31	Male	0.242343	0.399231	0.209285	0.0920532	0.0570895
608	Case	50	Female	0.273018	0.241379	0.271544	0.145566	0.0684932
609	Case	33	Female	0.227362	0.403	0.171525	0.128926	0.0691859
610	Control	45	Female	0.348948	0.158465	0.262431	0.159511	0.0706477
611	Control	39	Male	0.455567	0.221212	0.196216	0.0824818	0.0445236
612	Case	32	Male	0.281342	0.672272	0.0254691	0.0117032	0.00921364
613	Case	32	Female	0.449766	0.211595	0.163716	0.109986	0.064935
614	Case	28	Male	0.323185	0.420346	0.145949	0.0756618	0.0348591
615	Case	22	Male	0.448036	0.0819482	0.36272	0.0656482	0.0416468
616	Case	26	Male	0.302952	0.38365	0.156964	0.0895582	0.0668741
617	Case	20	Female	0.363406	0.333502	0.156436	0.0914486	0.0552059
618	Case	27	Female	0.28762	0.271758	0.277817	0.101768	0.0610382
619	Case	34	Female	0.302386	0.535063	0.0787868	0.0513686	0.0323973
620	Case	33	Male	0.216888	0.474425	0.185501	0.0700732	0.0531118
621	Case	26	Male	0.0561677	0.511032	0.327271	0.068835	0.0366927
622	Case	20	Female	0.165059	0.291485	0.314741	0.145405	0.08331
623	Case	39	Male	0.344602	0.19663	0.265055	0.129119	0.0645936
624	Case	22	Male	0.219143	0.217569	0.369353	0.132809	0.0611268
625	Case	46	Female	0.256067	0.323699	0.215237	0.123456	0.0815395
626	Case	54	Male	0.16484	0.179175	0.44572	0.141329	0.0689386
627	Case	29	Male	0.215565	0.746789	0.0177173	0.0101605	0.00976682
628	Case	35	Female	0.18445	0.206293	0.361348	0.167485	0.080425
629	Case	37	Male	0.195833	0.761623	0.0239773	0.0102477	0.00831773
630	Case	38	Male	0.268396	0.182631	0.350982	0.125857	0.0721345
631	Case	23	Female	0.366896	0.283576	0.202544	0.0911314	0.0558536
632	Case	20	Female	0.217041	0.391127	0.183601	0.133969	0.0742614
633	Case	54	Male	0.157115	0.24476	0.426559	0.112274	0.0592932
634	Case	48	Female	0.249027	0.51533	0.15879	0.0453509	0.0315023
635	Case	29	Female	0.291403	0.244872	0.26779	0.122191	0.0737427
636	Case	48	Female	0.117997	0.151142	0.529489	0.135	0.0663723
637	Case	23	Male	0.210782	0.24788	0.30145	0.154986	0.0849045
638	Case	35	Male	0.329461	0.303407	0.201564	0.101992	0.0635764
639	Case	23	Male	0.281351	0.382591	0.161866	0.111124	0.0630664
640	Case	32	Female	0.350075	0.374672	0.126682	0.100418	0.0481505
641	Case	29	Male	0.275451	0.461987	0.143701	0.0771327	0.0417268
642	Case	24	Male	0.334	0.0715745	0.448708	0.0877432	0.0579736
643	Case	35	Female	0.264877	0.249076	0.253489	0.147654	0.0849055
644	Case	33	Female	0.26479	0.296824	0.191163	0.1692	0.0780241
645	Case	28	Female	0.24665	0.302028	0.218737	0.157094	0.0754941
646	Case	47	Female	0.309324	0.473719	0.119877	0.0646505	0.0324309
647	Case	24	Female	0.4386	0.230362	0.167449	0.0993277	0.0642623
648	Case	26	Female	0.28837	0.223253	0.275056	0.143116	0.0702036
649	Case	30	Male	0.352403	0.226579	0.23369	0.127067	0.0602623
650	Case	51	Female	0.122324	0.375041	0.252484	0.158715	0.0914359
651	Case	44	Female	0.372182	0.28933	0.197938	0.0868791	0.0536705
652	Case	21	Male	0.189446	0.247366	0.339339	0.141262	0.0825864
653	Case	25	Female	0.29151	0.314857	0.196044	0.130995	0.0665932
654	Case	33	Male	0.121676	0.208942	0.403828	0.16985	0.0957023
655	Case	24	Male	0.34583	0.321081	0.230651	0.0623014	0.0401368
656	Case	20	Female	0.165321	0.157738	0.457706	0.134005	0.0852305
657	Case	32	Male	0.446691	0.143335	0.221011	0.12597	0.0629918
658	Case	33	Male	0.0274595	0.940442	0.0176468	0.00868864	0.00576318
659	Case	32	Female	0.243606	0.708689	0.0266973	0.0139773	0.00703227
660	Case	55	Male	0.0780391	0.35277	0.326459	0.166299	0.0764355
661	Case	29	Male	0.354502	0.259035	0.224378	0.0997332	0.06235
662	Case	19	Female	0.281762	0.415643	0.163069	0.0941127	0.0454118
663	Case	34	Female	0.229232	0.222591	0.317687	0.151658	0.0788323
664	Case	42	Female	0.26721	0.190459	0.392072	0.100153	0.050105
665	Case	33	Female	0.29353	0.262851	0.223519	0.154257	0.06584
666	Case	29	Female	0.48454	0.140679	0.223948	0.099785	0.0510486
667	Case	26	Male	0.186321	0.287929	0.3222	0.13128	0.0722695
668	Case	32	Male	0.289712	0.269645	0.208166	0.166417	0.0660595
669	Case	47	Male	0.204583	0.252563	0.271508	0.167474	0.103871
670	Case	21	Male	0.437705	0.20359	0.188064	0.122743	0.0478977
671	Case	50	Male	0.255353	0.702001	0.0233232	0.0108659	0.00845909
672	Case	55	Male	0.191155	0.161627	0.417061	0.143758	0.0863977
673	Case	23	Female	0.415096	0.287823	0.159765	0.0876455	0.0496723
674	Case	22	Female	0.149234	0.555171	0.141711	0.100908	0.0529732
675	Case	48	Male	0.243302	0.266568	0.29467	0.134055	0.0614068
676	Case	51	Male	0.238389	0.169394	0.348669	0.162922	0.0806245
677	Case	48	Female	0.262365	0.417712	0.115021	0.144806	0.060095
678	Case	23	Male	0.370879	0.267583	0.219045	0.0840114	0.0584809
679	Case	55	Male	0.185053	0.156403	0.390854	0.173792	0.0938986
680	Case	38	Female	0.236315	0.673127	0.0617014	0.0181832	0.0106736
681	Case	26	Female	0.433737	0.0473605	0.397056	0.0782677	0.0435791
682	Case	45	Female	0.187888	0.590575	0.102478	0.0903164	0.0287423
683	Case	31	Male	0.152905	0.395648	0.326861	0.0877482	0.0368368
684	Case	28	Male	0.227341	0.165954	0.423929	0.132111	0.0506664
685	Case	54	Male	0.465048	0.23454	0.207787	0.0560927	0.0365327
686	Case	49	Male	0.177315	0.0991468	0.420438	0.197481	0.10562
687	Case	21	Male	0.129273	0.28245	0.348363	0.156884	0.0830318
688	Case	65.2438	Female	0.265574	0.348215	0.255775	0.0913564	0.03908
689	Case	38.8137	Male	0.281479	0.198407	0.313669	0.136638	0.0698068
690	Case	69.7303	Female	0.451845	0.281074	0.176232	0.0561477	0.0347005
691	Case	28.4493	Female	0.368754	0.321325	0.167164	0.0981395	0.0446173
692	Case	20.8953	Male	0.28115	0.57257	0.0667536	0.0508532	0.0286741
693	Case	29.2375	Male	0.345484	0.355575	0.216675	0.0569595	0.0253064
694	Case	24.6986	Female	0.389401	0.556851	0.0294664	0.0161818	0.00810045
695	Case	29.7303	Female	0.250083	0.712845	0.0198095	0.00961727	0.00764455
696	Case	42.3682	Male	0.284088	0.289567	0.249393	0.126252	0.0506986
697	Case	29.1225	Male	0.340304	0.326621	0.214116	0.0860886	0.0328695
698	Case	20.663	Female	0.289122	0.316416	0.193344	0.14508	0.0560368
699	Case	31.4771	Male	0.179676	0.250687	0.322886	0.17497	0.0717805
700	Case	37.5606	Male	0.461132	0.275395	0.166292	0.0687523	0.0284286
701	Case	33.2375	Female	0.149268	0.297082	0.331274	0.151289	0.0710864
702	Case	42.7379	Female	0.301343	0.20837	0.30628	0.118801	0.0652059
703	Case	26.0589	Female	0.334545	0.221327	0.327015	0.0754114	0.0417036
704	Case	20.2437	Female	0.312091	0.325194	0.257302	0.0731686	0.0322459
705	Control	20.7173	Male	0.175965	0.209903	0.36859	0.180344	0.0651982
706	Case	45.8466	Female	0.202482	0.142592	0.408578	0.179989	0.0663591
707	Case	26.5205	Female	0.367519	0.51935	0.0713773	0.0277509	0.0140036
708	Case	47.2717	Male	0.365715	0.155079	0.345103	0.0945309	0.0395736
709	Case	17.87	Female	0.423828	0.0989268	0.338771	0.0976709	0.0408027
710	Case	33.3251	Male	0.316853	0.59994	0.0465718	0.0229941	0.0136405
711	Case	44.1916	Female	0.247795	0.257113	0.270574	0.169045	0.0554718
712	Case	31.8658	Female	0.175328	0.095735	0.565386	0.104659	0.0588918
713	Control	18.9021	Male	0.0541659	0.0889436	0.601725	0.177768	0.0773977
714	Control	30.8446	Female	0.214993	0.34765	0.326314	0.0716877	0.0393564
715	Control	51.6304	Female	0.251117	0.417348	0.15108	0.118397	0.0620577
716	Case	28.4819	Female	0.535527	0.239966	0.160126	0.0383332	0.0260473
717	Control	22.5435	Male	0.146875	0.164649	0.364992	0.244743	0.0787382
718	Case	32.5202	Male	0.511821	0.051055	0.344597	0.0641659	0.0283595
719	Control	40.5941	Male	0.24651	0.21934	0.309725	0.154689	0.0697373
720	Case	17.8535	Male	0.258445	0.258829	0.274508	0.140906	0.0673109
721	Case	33.8316	Female	0.197805	0.286939	0.27588	0.176935	0.0624382
722	Case	22.0287	Male	0.266341	0.12107	0.428556	0.125073	0.0589605
723	Case	48.0493	Male	0.356805	0.261968	0.26968	0.0713559	0.0401923
724	Control	28.7775	Female	0.183207	0.416508	0.286247	0.0700395	0.0439986
725	Case	44.9528	Male	0.0915841	0.120211	0.422528	0.276215	0.0894627
726	Control	19.6578	Female	0.149434	0.270513	0.264297	0.221901	0.0938527
727	Case	27.4223	Female	0.409561	0.0622591	0.315912	0.136749	0.0755195
728	Control	28.0137	Female	0.24846	0.184872	0.35881	0.155507	0.0523486
729	Case	24.3368	Female	0.47272	0.197681	0.235232	0.057185	0.0371823
730	Control	29.4894	Female	0.439539	0.155064	0.268214	0.100368	0.0368164
731	Case	25.8645	Female	0.282216	0.523231	0.122362	0.0548618	0.0173273
732	Control	30.0123	Female	0.138292	0.377839	0.359015	0.078735	0.0461205
733	Case	15.9343	Female	0.383677	0.15659	0.285851	0.119316	0.0545677
734	Control	36.4134	Female	0.119982	0.450233	0.190378	0.178135	0.0612727
735	Case	32.6571	Female	0.291605	0.374641	0.184678	0.104922	0.0441555
736	Case	43.3863	Female	0.0783414	0.249078	0.355166	0.220798	0.0966173
737	Case	32.2108	Male	0.225598	0.139624	0.434795	0.143224	0.0567618
738	Control	37.6016	Male	0.274799	0.234475	0.28265	0.147283	0.0607918
739	Control	35.0828	Female	0.169951	0.297111	0.336063	0.138722	0.0581545
740	Case	39.7753	Female	0.0814332	0.199105	0.465066	0.172846	0.08155
741	Case	36.731	Female	0.116943	0.242107	0.366033	0.18105	0.093865
742	Case	47.8412	Female	0.287679	0.611954	0.051615	0.0280214	0.0207309
743	Control	47.2438	Female	0.240477	0.608238	0.0839823	0.0424927	0.0248091
744	Case	30.3546	Female	0.246376	0.531969	0.100104	0.0811977	0.0403532
745	Control	35.332	Male	0.235233	0.203553	0.304646	0.188027	0.0685405
746	Control	30.5599	Female	0.305883	0.090165	0.412594	0.135317	0.0560427
747	Case	26.3929	Male	0.321796	0.1523	0.348273	0.126257	0.0513745
748	Case	67.8111	Male	0.266322	0.377826	0.224508	0.0854136	0.0459318
749	Control	44.4928	Female	0.315695	0.25721	0.228402	0.133343	0.0653514
750	Case	24.9418	Female	0.150151	0.40538	0.176315	0.183031	0.0851223
751	Case	48.9582	Female	0.0630532	0.168859	0.493017	0.184088	0.0909836
752	Case	33.1061	Female	0.257312	0.321744	0.245416	0.117765	0.0577655
753	Case	30.9706	Female	0.37463	0.181761	0.321081	0.0832868	0.0392414
754	Case	38.204	Female	0.285301	0.291255	0.274622	0.10307	0.0457527
755	Case	27.4606	Female	0.192721	0.388304	0.308449	0.0661977	0.0443295
756	Control	30.8419	Male	0.222677	0.326506	0.272042	0.126604	0.0521705
757	Case	29.1307	Male	0.145466	0.827475	0.0155718	0.00487682	0.00661091
758	Control	38.3518	Female	0.306827	0.436825	0.129517	0.0839636	0.0428677
759	Case	78.7269	Female	0.106415	0.177485	0.365897	0.249574	0.100629
760	Case	30.4175	Male	0.326694	0.407695	0.113777	0.103405	0.0484282
761	Case	32.7693	Male	0.38553	0.269128	0.162523	0.118367	0.0644495
762	Case	25.6044	Male	0.204854	0.120785	0.39928	0.19561	0.0794714
763	Case	25.6045	Male	0.415757	0.280074	0.148981	0.104284	0.0509023
764	Case	28.9117	Male	0.30724	0.380911	0.138372	0.131559	0.0419182
765	Case	20.167	Female	0.128455	0.58398	0.1585	0.0913545	0.0377109
766	Case	29.1964	Female	0.399695	0.319596	0.141461	0.0886045	0.0506409
767	Case	30.6119	Female	0.424314	0.194131	0.16482	0.159123	0.057615
768	Case	22.1574	Female	0.362345	0.284202	0.236727	0.0846791	0.0320459
769	Control	29.7659	Male	0.134968	0.1116	0.434755	0.226811	0.0918659
770	Case	29.2786	Female	0.35971	0.581575	0.0352818	0.0135827	0.00985136
771	Case	20.5448	Female	0.187932	0.19086	0.366245	0.188074	0.0668895
772	Case	36.9938	Male	0.345246	0.0346473	0.46647	0.104302	0.0493341
773	Case	27.2909	Male	0.264536	0.253121	0.266832	0.150795	0.0647168
774	Control	40.115	Female	0.407257	0.27048	0.183978	0.101346	0.03694
775	Case	27.614	Male	0.134587	0.344046	0.369026	0.105019	0.04732
776	Case	34.4695	Female	0.425905	0.346823	0.107247	0.0835241	0.0364986
777	Case	34.4696	Male	0.376739	0.275965	0.256581	0.0676245	0.0230886
778	Case	30.3326	Male	0.261445	0.276541	0.266037	0.134099	0.0618782
779	Case	22.5407	Female	0.46057	0.17334	0.225216	0.10417	0.0367045
780	Control	27.332	Female	0.576906	0.123449	0.187249	0.0849345	0.0274618
781	Case	30.0999	Male	0.245725	0.626365	0.0624605	0.0404209	0.0250277
782	Case	23.0137	Female	0.0384168	0.120015	0.440315	0.28908	0.112171
783	Case	30.089	Male	0.30657	0.156258	0.357755	0.124239	0.0551768
784	Case	27.7317	Male	0.153834	0.33196	0.392842	0.0825145	0.0388505
785	Case	42.1437	Male	0.368665	0.109675	0.321812	0.154489	0.0453564
786	Case	30.0753	Male	0.195738	0.286611	0.366475	0.106418	0.0447591
787	Case	18.9158	Male	0.249462	0.385816	0.187581	0.12735	0.0497914
788	Case	30.6694	Female	0.504509	0.15954	0.251725	0.0575186	0.0267055
789	Case	41.0103	Female	0.152502	0.577542	0.151176	0.08455	0.0342286
790	Case	42.1328	Male	0.376977	0.269665	0.224043	0.08853	0.0407818
791	Case	55.7673	Female	0.307024	0.331553	0.234053	0.08133	0.0460395
792	Case	22.3655	Male	0.216365	0.504353	0.169708	0.0706623	0.0389123
793	Case	24.4928	Female	0.392003	0.261313	0.258359	0.0595041	0.0288209
794	Case	31.6769	Male	0.21378	0.736135	0.0204618	0.0176173	0.0120082
795	Case	27.5318	Male	0.0883755	0.192715	0.328945	0.292779	0.0971873
796	Case	27.8303	Male	0.371278	0.129258	0.411386	0.0577695	0.0303086
797	Case	36.4983	Female	0.280311	0.21788	0.280601	0.145709	0.0754995
798	Case	24.3094	Male	0.179867	0.126255	0.427047	0.176453	0.0903795
799	Case	41.87	Female	0.182993	0.253832	0.428457	0.0916623	0.0430573
800	Case	27.7782	Male	0.0273877	0.208654	0.574959	0.12829	0.0607105
801	Case	32.0849	Male	0.267098	0.169376	0.361272	0.140286	0.0619691
802	Case	31.7043	Female	0.448989	0.3869	0.111356	0.033995	0.0187609
803	Case	28.3258	Male	0.22294	0.250236	0.320624	0.145297	0.0609
804	Case	19.1458	Male	0.383637	0.41218	0.089365	0.0756491	0.0391677
805	Case	19.6824	Female	0.264768	0.464509	0.139548	0.0953477	0.0358259
806	Case	34.4942	Female	0.37069	0.258132	0.22723	0.0926614	0.0512882
807	Case	93.2266	Male	0.149565	0.811638	0.02057	0.0125936	0.00563227
808	Case	19.5921	Male	0.214448	0.420158	0.186107	0.12657	0.0527173
809	Case	38.6694	Male	0.320322	0.339327	0.223944	0.0836282	0.0327768
810	Control	53.2375	Female	0.348936	0.170685	0.256881	0.15988	0.0636173
811	Case	24.1944	Female	0.229661	0.364942	0.270734	0.0862236	0.0484405
812	Case	59.206	Female	0.406699	0.489155	0.0677627	0.0252018	0.0111777
813	Case	51.9452	Male	0.31606	0.267772	0.216814	0.138406	0.0609455
814	Case	14.5507	Male	0.510508	0.214224	0.169224	0.0736277	0.0324159
815	Case	45.674	Female	0.398983	0.5013	0.0622009	0.0256582	0.0118577
816	Case	28.95	Male	0.239911	0.329793	0.279113	0.10232	0.0488641
817	Case	34.0219	Male	0.177597	0.660174	0.0729341	0.0608927	0.0284023
818	Case	39.2389	Male	0.202253	0.542117	0.07771	0.123518	0.0544023
819	Case	27.8959	Female	0.224496	0.26724	0.392801	0.0703968	0.0450645
820	Case	50.2137	Male	0.384325	0.200843	0.241547	0.119748	0.0535364
821	Case	35.2745	Male	0.307662	0.33964	0.222318	0.0810555	0.0493223
822	Case	23.7864	Female	0.340427	0.558577	0.0508259	0.0310714	0.0190982
823	Case	33.1116	Female	0.23264	0.280159	0.2287	0.173874	0.084625
824	Case	40.3562	Male	0.2849	0.19283	0.312843	0.149434	0.0599936
825	Case	30.8658	Male	0.285612	0.301247	0.262614	0.106351	0.0441768
826	Case	26.6968	Male	0.315958	0.2071	0.28525	0.136293	0.0554
827	Case	37.5606	Male	0.451226	0.319711	0.119817	0.0714432	0.0378005
828	Case	26.4476	Male	0.236127	0.361562	0.190755	0.148369	0.0631882
829	Case	33.7632	Female	0.233175	0.713027	0.0291055	0.0151968	0.00949545
830	Case	65.7495	Female	0.184242	0.531514	0.230601	0.0316227	0.0220218
831	Case	39.6961	Male	0.253932	0.285318	0.21339	0.169168	0.0781891
832	Case	35.5619	Female	0.15896	0.234382	0.398299	0.142733	0.0656264
833	Case	50.4969	Female	0.16968	0.256909	0.321597	0.172919	0.0788959
834	Case	56.8164	Male	0.168396	0.151744	0.426743	0.18797	0.0651482
835	Case	44.6543	Male	0.12857	0.334344	0.261458	0.197623	0.0780036
836	Case	45.9795	Female	0.344996	0.31019	0.219952	0.0810391	0.0438223
837	Case	41.6783	Female	0.576944	0.304796	0.0770423	0.0227259	0.0184923
838	Case	29.3087	Male	0.428534	0.278482	0.17233	0.0861068	0.0345491
839	Case	18.0424	Male	0.132	0.122796	0.504254	0.164523	0.0764268
840	Case	35.6249	Male	0.30884	0.270761	0.270461	0.101614	0.0483241
841	Case	40.4846	Female	0.244761	0.405306	0.208492	0.088525	0.0529173
842	Case	27.6194	Female	0.45208	0.151304	0.298783	0.0667595	0.0310764
843	Case	41.1855	Female	0.143133	0.75127	0.0430532	0.0423718	0.0201723
844	Case	36.4271	Male	0.178156	0.782121	0.0185773	0.00917545	0.0119709
845	Case	24.731	Male	0.204906	0.51747	0.169579	0.0679523	0.040095
846	Case	18.026	Female	0.453802	0.216367	0.175922	0.113193	0.0407182
847	Case	32.6215	Female	0.394009	0.110625	0.320748	0.124934	0.0496845
848	Case	42.8309	Male	0.236329	0.346724	0.194999	0.171929	0.0500177
849	Case	44.1205	Male	0.221234	0.0841473	0.470264	0.16542	0.0589345
850	Case	24.4271	Male	0.466831	0.218272	0.230455	0.057745	0.0266986
851	Case	33.3854	Female	0.407681	0.422809	0.102497	0.0477636	0.01925
852	Case	33.3855	Female	0.205514	0.749335	0.0247195	0.01096	0.00947091
853	Case	62.4285	Female	0.401544	0.2069	0.234342	0.106293	0.0509209
854	Case	60.3751	Male	0.46244	0.344843	0.0859659	0.0738168	0.0329341
855	Case	52.9391	Female	0.347375	0.366935	0.186954	0.0708173	0.0279168
856	Case	19.2854	Male	0.263611	0.30145	0.239702	0.137977	0.0572609
857	Case	41.7139	Male	0.348625	0.161811	0.278507	0.148197	0.0628605
858	Case	34.2478	Male	0.1485	0.110132	0.49939	0.174277	0.0677005
859	Case	36.0931	Female	0.202155	0.198465	0.371734	0.164435	0.0632095
860	Case	26.4312	Male	0.185244	0.492107	0.148975	0.117632	0.0560427
861	Case	52.7502	Male	0.351803	0.304733	0.17707	0.116035	0.0503586
862	Case	20.8679	Female	0.491376	0.199275	0.19673	0.0687205	0.0438968
863	Control	39.1458	Male	0.280998	0.518345	0.118392	0.0618323	0.0204314
864	Case	35.2717	Male	0.360993	0.476955	0.0998018	0.0386345	0.0236136
865	Case	29.3607	Male	0.251716	0.652204	0.0458182	0.0312009	0.0190618
866	Case	30.8932	Female	0.324191	0.145225	0.361939	0.108334	0.0603105
867	Case	25.6318	Male	0.221176	0.213577	0.345657	0.147792	0.0717964
868	Case	41.525	Female	0.318603	0.30442	0.197712	0.123522	0.0557414
869	Case	55.0253	Male	0.241264	0.490845	0.135263	0.0860223	0.0466041
870	Case	23.5893	Male	0.497813	0.279369	0.150689	0.0499577	0.0221686
871	Case	29.3032	Female	0.324624	0.299853	0.230882	0.0997005	0.0449391
872	Case	54.7023	Male	0.402748	0.143197	0.297915	0.0952036	0.0609373
873	Case	40.8953	Male	0.466687	0.305455	0.121028	0.0808664	0.0259645
874	Case	33.0869	Male	0.192622	0.217717	0.366368	0.157739	0.0655555
875	Case	32.4849	Female	0.206767	0.202889	0.368965	0.151449	0.0699318
876	Case	26.2	Male	0.228671	0.56455	0.113148	0.06883	0.0248009
877	Case	23.1918	Male	0.257584	0.155174	0.327595	0.183608	0.0760382
878	Case	19.1786	Male	0.496514	0.431775	0.0425177	0.0153477	0.0138477
879	Case	31.4415	Male	0.196786	0.368628	0.23388	0.140431	0.060275
880	Case	29.0541	Male	0.236385	0.356195	0.328973	0.0499123	0.0285341
881	Case	38.7899	Female	0.13648	0.692421	0.0772141	0.062935	0.0309477
882	Case	23.1677	Male	0.152181	0.628152	0.168245	0.0292282	0.0221932
883	Case	25.9439	Male	0.331775	0.585783	0.0476464	0.02421	0.010585
884	Case	47.8631	Female	0.162544	0.718384	0.0364118	0.0472427	0.0354182
885	Case	55.2772	Male	0.408325	0.184122	0.236562	0.114726	0.0562641
886	Case	30.2301	Female	0.324753	0.502108	0.0864786	0.0568755	0.0297868
887	Case	31.4552	Female	0.47438	0.155605	0.248687	0.0815355	0.0397927
888	Case	35.4575	Female	0.213015	0.745221	0.0212236	0.00907682	0.0114641
889	Case	31.2334	Female	0.391959	0.266797	0.189789	0.107362	0.0440955
890	Case	48.1725	Female	0.495734	0.155094	0.181501	0.118278	0.0493941
891	Case	36.6685	Female	0.336415	0.235335	0.233454	0.12553	0.0692664
892	Case	29.6044	Male	0.387847	0.273198	0.187837	0.10755	0.04357
893	Case	29.6045	Male	0.372485	0.18204	0.307441	0.0913255	0.04671
894	Case	51.3703	Male	0.238876	0.215729	0.308157	0.16156	0.0756773
895	Case	45.9548	Female	0.38183	0.193182	0.249128	0.125435	0.0504255
896	Case	55.7591	Male	0.21857	0.33551	0.212691	0.16082	0.0724073
897	Case	30.3546	Male	0.429908	0.256274	0.21669	0.0574514	0.0396773
898	Case	37.295	Male	0.0921786	0.214314	0.408511	0.213715	0.07128
899	Case	33.3388	Male	0.311435	0.295169	0.215828	0.120241	0.0573273
900	Case	30.423	Male	0.0787505	0.123916	0.615445	0.125901	0.0559868
901	Case	50.5507	Male	0.219191	0.248051	0.282885	0.166033	0.0838391
902	Case	32.1342	Male	0.226965	0.5836	0.115121	0.0428855	0.0314273
903	Case	34.0233	Male	0.181772	0.199747	0.289486	0.228951	0.100043
904	Case	41.3087	Female	0.355277	0.110664	0.372928	0.108866	0.0522645
905	Case	38.5315	Female	0.270001	0.280096	0.252196	0.142984	0.0547232
906	Case	30.2587	Female	0.167693	0.32042	0.313751	0.125578	0.0725577
907	Case	30.0808	Female	0.376004	0.319756	0.234095	0.0458173	0.0243277
908	Case	28.2875	Female	0.252608	0.112987	0.438032	0.12769	0.0686841
909	Case	28.2409	Male	0.46013	0.172915	0.209307	0.101186	0.0564623
910	Case	28.3395	Female	0.290339	0.152129	0.26259	0.208018	0.0869259
911	Case	29.9411	Female	0.48093	0.203315	0.202113	0.0691973	0.0444468
912	Case	28.2601	Male	0.352737	0.459933	0.112778	0.0469755	0.0275764
913	Case	61.726	Male	0.285348	0.648769	0.0266741	0.0227773	0.0164318
914	Case	51.3562	Female	0.243371	0.379599	0.185647	0.133672	0.0577123
915	Case	48.9616	Female	0.531419	0.162687	0.160005	0.0937995	0.0520895
916	Case	44.5205	Female	0.547327	0.0982273	0.197515	0.100596	0.0563355
917	Case	56.4353	Female	0.349056	0.120715	0.346768	0.129233	0.0542273
918	Case	19.3949	Male	0.158561	0.291726	0.320211	0.161345	0.0681559
919	Case	46.8521	Male	0.47396	0.23405	0.219704	0.048495	0.0237914
920	Case	41.1534	Female	0.162082	0.355941	0.316702	0.114753	0.0505255
921	Case	19.8521	Male	0.224932	0.503135	0.189816	0.0554905	0.0266259
922	Case	16.5315	Male	0.321044	0.146209	0.292595	0.167992	0.0721627
923	Case	40.5397	Male	0.335074	0.249348	0.285999	0.0899423	0.0396368
924	Case	20.9671	Male	0.322972	0.376784	0.152928	0.098455	0.04886
925	Case	50.4247	Male	0.507851	0.161928	0.190293	0.0948945	0.0450327
926	Case	29.1616	Male	0.489982	0.461277	0.0308359	0.00790273	0.0100009
927	Case	43.0219	Female	0.265486	0.343302	0.265195	0.0902532	0.0357623
928	Case	34.475	Male	0.282384	0.139743	0.388217	0.135162	0.0544945
929	Case	29.4812	Male	0.305838	0.222042	0.239429	0.154806	0.077885
930	Case	41.2375	Female	0.143283	0.666059	0.0826091	0.0743941	0.0336555
931	Case	40.3726	Male	0.267985	0.399499	0.167117	0.11504	0.0503609
932	Case	30.13	Male	0.205405	0.216637	0.39895	0.120647	0.0583614
933	Case	35.3539	Male	0.132375	0.228032	0.379869	0.179708	0.0800159
934	Case	36.0684	Male	0.311974	0.518891	0.108329	0.0400282	0.0207791
935	Case	50.3573	Female	0.2176	0.327425	0.22634	0.154201	0.0744336
936	Case	13.2685	Female	0.36748	0.140934	0.349395	0.099765	0.0424268
937	Case	49.074	Female	0.277762	0.329486	0.254433	0.103698	0.0346218
938	Case	23.707	Male	0.36237	0.25243	0.240966	0.0868577	0.0573764
939	Case	25.2658	Male	0.344113	0.329577	0.182867	0.106926	0.0365168
940	Case	31.8138	Male	0.268166	0.32165	0.280675	0.0887855	0.0407209
941	Case	27.0719	Male	0.439014	0.227731	0.20209	0.0872736	0.0438905
942	Case	27.2498	Female	0.405335	0.210483	0.277327	0.0727445	0.0341105
943	Case	41.4784	Female	0.216128	0.215878	0.207263	0.264057	0.0966782
944	Case	67.6849	Female	0.351567	0.363633	0.180347	0.0701591	0.0342927
945	Case	59.5315	Female	0.283145	0.578347	0.091355	0.0271759	0.0199782
946	Case	13.9918	Male	0.183142	0.0998164	0.484478	0.155852	0.0767091
947	Case	29.0274	Female	0.482091	0.22378	0.172207	0.0778964	0.0440268
948	Control	34.59	Female	0.167314	0.566413	0.13492	0.0953064	0.0360445
949	Control	37.4932	Male	0.37887	0.395632	0.129048	0.0608709	0.0355777
950	Case	18.8466	Male	0.17269	0.278237	0.232953	0.233368	0.0827518
951	Case	13.526	Male	0.156696	0.0632214	0.507442	0.16513	0.107511
952	Case	8.67671	Male	0.196983	0.475314	0.199073	0.0960045	0.0326264
953	Case	20.6164	Male	0.157355	0.6808	0.125139	0.0244514	0.012255
954	Control	17.2329	Male	0.165464	0.311909	0.315126	0.143801	0.0637
955	Case	67.0986	Male	0.371312	0.490082	0.0531214	0.0524832	0.0330027
956	Case	38.3918	Male	0.296285	0.210992	0.228413	0.1783	0.0860123
957	Case	32.3205	Female	0.0691936	0.204475	0.425269	0.205414	0.0956495
958	Case	20.4301	Male	0.173261	0.150147	0.475379	0.135546	0.0656664
959	Case	23.6356	Male	0.230768	0.143809	0.381661	0.17463	0.06913
960	Case	42.2192	Male	0.195833	0.527064	0.197713	0.0465109	0.0328786
961	Case	44.3151	Male	0.365495	0.178477	0.315505	0.0907745	0.0497464
962	Case	18.5425	Male	0.27472	0.481165	0.126335	0.0819877	0.0357914
963	Case	25.2877	Male	0.36809	0.235062	0.205158	0.130056	0.0616336
964	Case	38.2192	Female	0.205674	0.262168	0.323151	0.152693	0.0563155
965	Case	22.5288	Male	0.16448	0.452546	0.164622	0.149995	0.0683555
966	Case	53.2904	Female	0.164144	0.256203	0.284359	0.199159	0.0961327
967	Control	46.1041	Male	0.14402	0.455782	0.204089	0.141528	0.0545795
968	Control	49.7534	Male	0.451221	0.30752	0.125204	0.0807305	0.0353241
969	Control	64.1644	Male	0.411809	0.300346	0.14967	0.0963109	0.0418655
970	Control	39.863	Male	0.456742	0.330407	0.17245	0.0288	0.0116032
971	Control	47.0301	Female	0.330044	0.228008	0.290683	0.105245	0.0460191
972	Control	31.5068	Female	0.182679	0.588619	0.177957	0.0344791	0.0162664
973	Control	61.4164	Female	0.304786	0.479371	0.0907918	0.0874427	0.0376064
974	Control	63.8575	Male	0.191677	0.77577	0.0154032	0.0110273	0.00612409
975	Control	34.5726	Male	0.220822	0.31437	0.23334	0.168279	0.0631905
976	Control	17.5743	Male	0.145995	0.234184	0.380165	0.171119	0.0685386
977	Control	26.0808	Male	0.400019	0.564815	0.0110064	0.0161073	0.00805455
978	Control	33.7769	Male	0.53536	0.372863	0.0536627	0.0259859	0.0121295
979	Case	35.5096	Male	0.161136	0.207658	0.394383	0.164787	0.0720355
980	Case	31.6824	Male	0.363085	0.405899	0.130968	0.0659114	0.0341355
981	Case	40.8843	Male	0.113968	0.127601	0.520322	0.158967	0.0791423
982	Control	40.1971	Male	0.341416	0.213332	0.227111	0.152488	0.0656505
983	Control	32.7173	Male	0.263909	0.385233	0.174917	0.121425	0.0545141
984	Control	38.037	Male	0.0941268	0.11688	0.475588	0.204255	0.109151
985	Control	30.7488	Male	0.298763	0.227937	0.329005	0.108532	0.0357636
986	Control	37.8344	Male	0.255656	0.536798	0.0993741	0.0773295	0.0308427
987	Case	55.1616	Female	0.142571	0.28554	0.304485	0.189026	0.0783755
988	Case	26.0342	Female	0.221851	0.254549	0.31184	0.145349	0.0664136
989	Case	57.3963	Female	0.0350368	0.0875495	0.625132	0.173025	0.0792568
990	Case	42.8802	Female	0.297068	0.153699	0.337085	0.145865	0.0662841
991	Case	33.6372	Female	0.253299	0.570427	0.0684964	0.0710709	0.036705
992	Case	55.9945	Male	0.197049	0.451796	0.179239	0.117967	0.0539468
993	Case	46.4778	Male	0.173868	0.193881	0.396073	0.163022	0.0731536
994	Case	27.1595	Male	0.408253	0.213251	0.242435	0.0940259	0.0420345
995	Case	39.8823	Male	0.370997	0.175956	0.269343	0.123421	0.0602818
996	Case	47.2854	Male	0.156362	0.153687	0.488531	0.14564	0.05578
997	Case	41.232	Female	0.289148	0.276069	0.234505	0.13896	0.0613173
998	Case	31.4387	Male	0.194057	0.735179	0.0497055	0.0138973	0.00716045
999	Case	15.9562	Male	0.355861	0.567517	0.0472568	0.0190755	0.01029
1000	Case	56.8877	Female	0.350786	0.610206	0.0212464	0.00861	0.00915091
1001	Case	33.87	Female	0.174446	0.281464	0.336986	0.137756	0.069345
1002	Case	46.1273	Male	0.336196	0.101178	0.368685	0.134483	0.0594582
1003	Case	40.2795	Male	0.416517	0.144194	0.284362	0.0953659	0.0595636
1004	Case	37.6701	Female	0.201091	0.239174	0.206926	0.238938	0.11387
1005	Case	41.1472	Male	0.558139	0.398709	0.0177423	0.0165814	0.00882773
1006	Case	36.4162	Male	0.338964	0.200198	0.204699	0.182643	0.073495
1007	Case	58.2822	Male	0.102606	0.26063	0.33917	0.2084	0.0891927
1008	Case	32.9665	Male	0.163224	0.287647	0.383727	0.117807	0.0475941
1009	Case	58.6338	Male	0.203638	0.607455	0.114934	0.053395	0.0205782
1010	Case	30.0685	Female	0.0693391	0.635219	0.129354	0.120657	0.0454282
1011	Case	39.3895	Female	0.300042	0.458291	0.108272	0.0839164	0.0494809
1012	Case	38.3025	Male	0.432121	0.390787	0.114862	0.0396855	0.022545
1013	Case	62.9076	Female	0.452344	0.144531	0.2322	0.12613	0.0447955
1014	Case	32.2849	Female	0.391186	0.145656	0.270017	0.132715	0.0604245
1015	Control	32.4189	Male	0.259531	0.549825	0.0814132	0.0668409	0.0423868
1016	Case	23.8001	Male	0.504948	0.150033	0.17174	0.116795	0.0564836
1017	Case	26.6256	Male	0.58368	0.282115	0.0563	0.0510609	0.0268436
1018	Case	20.835	Female	0.582264	0.185365	0.140887	0.0631082	0.0283786
1019	Case	19.9616	Female	0.452379	0.152698	0.175468	0.152762	0.066695
1020	Case	47.8604	Male	0.227178	0.724705	0.0316155	0.00997273	0.00652864
1021	Case	43.7755	Male	0.193247	0.270985	0.260019	0.216389	0.0593577
1022	Case	27.8249	Male	0.159258	0.524155	0.237859	0.0504918	0.0282373
1023	Case	36.9227	Female	0.253758	0.101553	0.41596	0.160657	0.0680727
1024	Case	25.5113	Female	0.20312	0.614803	0.0972327	0.050415	0.0344282
1025	Case	29.4812	Female	0.297174	0.44538	0.131285	0.0898436	0.0363182
1026	Case	68.8268	Female	0.366903	0.200138	0.297966	0.0925991	0.0423945
1027	Case	33.6208	Male	0.186561	0.249889	0.29501	0.188442	0.0800995
1028	Case	17.6865	Male	0.273011	0.380304	0.178894	0.104403	0.0633877
1029	Case	53.64	Female	0.269098	0.117256	0.33639	0.208407	0.0688477
1030	Control	36.4791	Male	0.18984	0.334258	0.24411	0.154621	0.0771677
1031	Case	25.8152	Female	0.350576	0.288325	0.221199	0.104832	0.0350682
1032	Case	28.063	Female	0.528242	0.162122	0.195314	0.0872936	0.0270277
1033	Case	24.961	Male	0.327595	0.172023	0.316787	0.140027	0.0435659
1034	Case	46.976	Male	0.39894	0.449271	0.0973741	0.0332682	0.0211464
1035	Case	25.4073	Female	0.257665	0.422237	0.247445	0.0469509	0.0257009
1036	Case	26.5918	Female	0.332479	0.296435	0.209702	0.107536	0.0538468
1037	Case	23.5342	Male	0.369015	0.278118	0.224908	0.0919868	0.0359736
1038	Case	24.0219	Female	0.562255	0.272109	0.0775195	0.0546559	0.0334632
1039	Case	20.1369	Female	0.422855	0.0511264	0.370309	0.11761	0.0381005
1040	Case	20.137	Female	0.119738	0.337426	0.340395	0.141848	0.0605909
1041	Case	37.8207	Male	0.33611	0.310226	0.154233	0.14343	0.0559977
1042	Case	34.8364	Male	0.473651	0.157205	0.224985	0.0910495	0.0531109
1043	Case	46.8685	Female	0.410945	0.249829	0.240181	0.0637436	0.0353014
1044	Case	42.0643	Female	0.31735	0.267562	0.212826	0.137605	0.0646555
1045	Case	22.1986	Male	0.222386	0.232273	0.285201	0.177007	0.0831314
1046	Case	24.5969	Female	0.323118	0.148822	0.31394	0.150068	0.0640523
1047	Case	20.8022	Female	0.353347	0.18182	0.356	0.06513	0.0437023
1048	Case	25.7741	Female	0.385991	0.278461	0.229539	0.0683595	0.0376505
1049	Case	25.6493	Male	0.183685	0.204424	0.34599	0.20376	0.0621386
1050	Case	32.104	Female	0.312065	0.447311	0.118582	0.0795459	0.0424959
1051	Case	39.7397	Male	0.168826	0.21318	0.406401	0.14355	0.0680414
1052	Case	39.2991	Male	0.457975	0.203836	0.222608	0.0776509	0.0379314
1053	Case	35.9863	Female	0.350814	0.287879	0.178206	0.130083	0.0530168
1054	Case	35.9864	Male	0.239511	0.595788	0.10031	0.045645	0.0187464
1055	Control	35.603	Male	0.211851	0.152234	0.306456	0.22622	0.103241
1056	Case	43.9726	Female	0.231411	0.290275	0.268314	0.131181	0.0788177
1057	Case	33.4401	Male	0.432853	0.203046	0.235206	0.0881427	0.0407532
1058	Case	32.2437	Male	0.168615	0.153466	0.487882	0.126953	0.0630827
1059	Case	37.8207	Male	0.180971	0.363457	0.306578	0.107139	0.0418568
1060	Case	30.2438	Male	0.43226	0.262591	0.211578	0.0533818	0.0401891
1061	Case	43.1753	Male	0.567817	0.136305	0.197295	0.06654	0.0320414
1062	Case	67.0986	Male	0.252016	0.134674	0.459696	0.111475	0.0421368
1063	Case	37.8891	Male	0.0863314	0.306897	0.335173	0.182633	0.0889673
1064	Case	33.2356	Male	0.193377	0.759486	0.0209582	0.0193886	0.00678818
1065	Case	29.4603	Male	0.518729	0.321205	0.0833309	0.0537332	0.0230023
1066	Case	29.4603	Male	0.330119	0.353787	0.166838	0.104747	0.0445105
1067	Case	43.4689	Female	0.342121	0.131375	0.347626	0.118314	0.0605636
1068	Case	34.1218	Male	0.226722	0.467482	0.120374	0.129156	0.056265
1069	Case	63.0137	Male	0.311821	0.283774	0.25662	0.102079	0.0457077
1070	Case	40.5863	Male	0.35233	0.232134	0.20493	0.141491	0.069115
1071	Case	36.2765	Female	0.248414	0.618059	0.0548368	0.0525445	0.0261455
1072	Case	65.7233	Female	0.210855	0.176141	0.389572	0.15721	0.0662232
1073	Case	33.6947	Male	0.352998	0.0790455	0.407885	0.104088	0.0559877
1074	Case	24.3534	Male	0.183584	0.68063	0.0803482	0.0359709	0.0194664
1075	Case	38.0397	Male	0.419597	0.205825	0.210875	0.117425	0.0462745
1076	Case	31.9507	Male	0.559338	0.220831	0.149894	0.0408323	0.0291036
1077	Case	43.9261	Female	0.359349	0.326102	0.197001	0.0753759	0.0421727
1078	Case	42.2615	Female	0.404182	0.220919	0.187593	0.131322	0.0559841
1079	Case	28.6598	Male	0.198013	0.22789	0.321387	0.171315	0.0813945
1080	Case	46.6064	Female	0.249757	0.19834	0.288033	0.17782	0.0860514
1081	Case	34.3041	Female	0.365666	0.307134	0.13367	0.139231	0.0542959
1082	Case	35.3648	Male	0.440599	0.46673	0.0507545	0.0303918	0.0115245
1083	Case	36.3285	Male	0.0613877	0.12389	0.561629	0.173106	0.0799886
1084	Case	48.5421	Male	0.13118	0.251169	0.304395	0.213265	0.0999909
1085	Case	45.2348	Male	0.367067	0.240518	0.206496	0.13863	0.0472905
1086	Case	28.1287	Male	0.366788	0.538682	0.0645964	0.0205527	0.00938
1087	Case	36.2793	Male	0.16394	0.312266	0.23515	0.220482	0.06816
1088	Case	44.4326	Female	0.274374	0.349162	0.17585	0.143439	0.0571764
1089	Case	43.3812	Female	0.441764	0.211432	0.235188	0.0684318	0.043185
1090	Case	25.3142	Female	0.303247	0.168291	0.297511	0.159935	0.071015
1091	Case	50.2067	Male	0.36613	0.244545	0.23668	0.0995777	0.0530677
1092	Case	28.6817	Male	0.268287	0.186006	0.354472	0.13633	0.0549055
1093	Case	30.8474	Male	0.218276	0.400231	0.187471	0.136306	0.0577182
1094	Case	29.7769	Female	0.201587	0.347635	0.240269	0.150313	0.060195
1095	Case	40.8597	Male	0.410301	0.23993	0.20017	0.103283	0.0463159
1096	Case	27.9644	Male	0.261928	0.408194	0.170547	0.117837	0.0414936
1097	Case	27.666	Female	0.393351	0.20871	0.220644	0.12292	0.0543755
1098	Case	28.8569	Male	0.134428	0.538375	0.158017	0.130471	0.0387095
1099	Case	57.2211	Male	0.22599	0.306721	0.247958	0.158026	0.0613059
1100	Case	34.757	Female	0.2088	0.245712	0.295925	0.175573	0.0739886
1101	Case	33.6865	Male	0.12575	0.293098	0.43675	0.0837836	0.0606182
1102	Case	44.2437	Male	0.333541	0.4847	0.0974836	0.0588973	0.0253791
1103	Case	22.193	Male	0.060875	0.335592	0.321693	0.190586	0.0912527
1104	Case	56.3751	Male	0.300135	0.284651	0.213359	0.14123	0.0606259
1105	Case	45.5825	Male	0.282337	0.188533	0.277963	0.178438	0.0727295
1106	Case	40.7529	Female	0.635597	0.335186	0.0153273	0.00952091	0.00436864
1107	Case	46.9459	Male	0.227747	0.274305	0.346568	0.107856	0.0435255
1108	Case	62.8693	Male	0.3335	0.294457	0.169887	0.140147	0.0620082
1109	Case	59.7755	Female	0.380334	0.42347	0.102935	0.0637914	0.0294705
1110	Case	39.9014	Female	0.174507	0.658644	0.0693936	0.0597623	0.0376964
1111	Case	49.0431	Female	0.23436	0.147568	0.390528	0.148947	0.0785968
1112	Case	46.3682	Male	0.199835	0.689777	0.0557709	0.0377568	0.0168595
1113	Case	24.5421	Female	0.32356	0.419124	0.118729	0.102821	0.0357682
1114	Case	31.6194	Male	0.340304	0.251623	0.25372	0.106173	0.0481786
1115	Case	50.1875	Male	0.418197	0.231702	0.198448	0.101297	0.0503555
1116	Case	40.5941	Male	0.385727	0.140103	0.323681	0.0989127	0.0515777
1117	Case	56.0027	Female	0.1835	0.1944	0.380495	0.163143	0.0784641
1118	Case	30.1644	Male	0.402833	0.25831	0.186679	0.110238	0.0419386
1119	Case	26.7598	Male	0.2709	0.190651	0.274088	0.184019	0.0803427
1120	Case	28.8104	Male	0.26455	0.213812	0.337547	0.12252	0.0615695
1121	Case	31.8604	Male	0.273718	0.146818	0.409105	0.109565	0.0607945
1122	Case	39.8549	Male	0.33868	0.273022	0.163813	0.153551	0.070935
1123	Case	41.2567	Male	0.154553	0.362359	0.248752	0.152159	0.0821773
1124	Case	44.0767	Male	0.198203	0.194665	0.311396	0.211105	0.0846309
1125	Case	28.4603	Male	0.344913	0.14916	0.331385	0.127241	0.0472995
1126	Case	32.1068	Female	0.240828	0.720164	0.0223414	0.00962545	0.00704136
1127	Case	33.9466	Female	0.340852	0.32766	0.213228	0.0751332	0.0431282
1128	Case	30.7515	Female	0.376921	0.160115	0.291285	0.11896	0.0527209
1129	Case	27.6769	Male	0.274265	0.328512	0.237892	0.10839	0.0509391
1130	Case	31.2444	Male	0.399661	0.20652	0.257095	0.0879327	0.0487914
1131	Case	18.3671	Female	0.3966	0.227416	0.24535	0.0825864	0.0480486
1132	Case	33.1472	Male	0.506366	0.310323	0.0630414	0.0800423	0.0402309
1133	Case	49.5918	Male	0.426573	0.242523	0.22618	0.0712	0.0335232
1134	Case	32.104	Female	0.194477	0.221259	0.448631	0.0910982	0.0445332
1135	Case	24.501	Female	0.297326	0.328321	0.223473	0.10406	0.0468186
1136	Case	26.8912	Female	0.575455	0.159281	0.189052	0.0559718	0.0202395
1137	Case	40.6653	Male	0.342447	0.184875	0.325809	0.101387	0.0454805
1138	Case	41.0376	Male	0.439628	0.129535	0.275688	0.104882	0.0502668
1139	Case	21.137	Female	0.250539	0.270547	0.308259	0.111842	0.0588141
1140	Case	20.7036	Female	0.323035	0.201269	0.3238	0.106099	0.0457986
1141	Case	32.0411	Female	0.233569	0.23257	0.324508	0.149409	0.0599468
1142	Case	37.4219	Male	0.609086	0.266108	0.0864864	0.0238809	0.0144391
1143	Case	31.4822	Female	0.460626	0.174525	0.257521	0.0746118	0.0327186
1144	Case	61.0404	Female	0.279575	0.297845	0.249037	0.126353	0.04719
1145	Case	43.4196	Male	0.29069	0.369065	0.198354	0.0956505	0.0462423
1146	Case	31.0082	Male	0.26396	0.501464	0.120695	0.0771664	0.0367145
1147	Case	63.9617	Male	0.287424	0.192272	0.254613	0.176975	0.0887182
1148	Case	20.3751	Male	0.326268	0.195301	0.309295	0.122709	0.0464255
1149	Case	25.399	Female	0.279234	0.226378	0.313133	0.121799	0.0594545
1150	Case	39.8767	Female	0.268421	0.17637	0.337003	0.159759	0.0584468
1151	Control	63.2877	Female	0.358362	0.386555	0.159058	0.0629114	0.0331132
1152	Case	38.3956	Female	0.446518	0.189629	0.202523	0.114769	0.0465609
1153	Case	38.3957	Female	0.32369	0.196615	0.356953	0.0854764	0.0372641
1154	Case	39.6277	Male	0.241113	0.218515	0.244771	0.221238	0.0743618
1155	Case	31.3429	Male	0.357995	0.359627	0.112672	0.123832	0.0458727
1156	Case	48.6817	Male	0.371382	0.277973	0.222378	0.0915832	0.0366845
1157	Case	40.167	Female	0.196444	0.599563	0.106488	0.0703723	0.0271341
1158	Case	50.5106	Male	0.28166	0.377411	0.200167	0.09983	0.0409345
1159	Case	43.4689	Female	0.273803	0.197321	0.323495	0.132362	0.0730164
1160	Case	37.7096	Male	0.311871	0.370687	0.18427	0.0957514	0.0374186
1161	Case	36.5859	Female	0.575474	0.235685	0.122019	0.0486255	0.018195
1162	Case	19.0472	Male	0.149345	0.143885	0.36393	0.237683	0.105159
1163	Case	19.9973	Female	0.533597	0.0470673	0.2995	0.0786827	0.0411514
1164	Case	20.4274	Female	0.261922	0.283261	0.254463	0.135648	0.0647059
1165	Case	41.1663	Female	0.377952	0.40878	0.138805	0.0528109	0.02165
1166	Case	38.6776	Female	0.147365	0.135696	0.416954	0.211689	0.0882986
1167	Case	38.8411	Male	0.283526	0.294584	0.272588	0.0928318	0.0564677
1168	Case	48.7556	Female	0.213122	0.424635	0.173346	0.13518	0.0537159
1169	Case	29.3826	Male	0.0759541	0.186153	0.447532	0.204736	0.0856277
1170	Case	37.5288	Female	0.202854	0.661084	0.0563373	0.0497323	0.0299932
1171	Case	40.5558	Female	0.383575	0.309774	0.176385	0.0946482	0.0356186
1172	Case	32.271	Male	0.137735	0.250479	0.411698	0.131747	0.0683423
1173	Case	47.8877	Female	0.227181	0.290436	0.298942	0.115901	0.0675368
1174	Case	19.8412	Female	0.264925	0.103485	0.468585	0.10604	0.0569659
1175	Case	26.1191	Male	0.129359	0.0931873	0.528805	0.167346	0.0813023
1176	Case	32.4654	Male	0.26211	0.279409	0.265668	0.145272	0.0475395
1177	Case	34.3053	Male	0.194694	0.166652	0.455757	0.11382	0.0690755
1178	Case	27.6331	Female	0.137016	0.24497	0.32327	0.205027	0.0897168
1179	Case	54.7214	Male	0.232216	0.48017	0.138156	0.102855	0.0466032
1180	Case	32.8131	Female	0.566209	0.280788	0.0776409	0.05492	0.0204409
1181	Case	35.781	Female	0.42315	0.149881	0.294315	0.0900645	0.0425905
1182	Control	41.8289	Male	0.252655	0.188728	0.209948	0.248831	0.0998409
1183	Control	38.768	Female	0.523239	0.139446	0.2562	0.0515427	0.0295709
1184	Control	42.3107	Male	0.259959	0.184281	0.382918	0.115689	0.0571523
1185	Case	26.924	Female	0.464664	0.109286	0.302005	0.0921455	0.0318973
1186	Control	28.3285	Male	0.428769	0.420893	0.0798764	0.0510777	0.0193836
1187	Control	8.14247	Male	0.24957	0.161853	0.387054	0.141249	0.0602718
1188	Control	32.2738	Male	0.252681	0.217041	0.289478	0.167563	0.0732386
1189	Case	35.614	Female	0.164573	0.23553	0.349771	0.181853	0.0682727
1190	Case	42.2204	Male	0.360735	0.22549	0.205596	0.138892	0.069285
1191	Case	26.2341	Female	0.250376	0.311026	0.257977	0.13207	0.0485536
1192	Case	30.0534	Female	0.306936	0.338708	0.189385	0.116413	0.0485577
1193	Case	47.9808	Female	0.248248	0.411162	0.177315	0.12092	0.0423568
1194	Case	31.4141	Female	0.377984	0.571571	0.0259645	0.0159305	0.00854909
1195	Case	48.9637	Female	0.266582	0.344701	0.248181	0.0962745	0.0442623
1196	Case	61.1335	Male	0.688147	0.167748	0.0894582	0.0400645	0.0145823
1197	Case	30.152	Female	0.163796	0.175103	0.354735	0.210656	0.09571
1198	Case	58.7288	Male	0.230637	0.723983	0.0216959	0.0150214	0.00866091
1199	Case	45.1973	Male	0.324745	0.160523	0.26584	0.169382	0.07951
1200	Case	40.271	Female	0.375251	0.359677	0.132314	0.0915	0.0412591
1201	Case	47.269	Female	0.347111	0.430897	0.0915768	0.0876618	0.0427527
1202	Case	29.5551	Male	0.323339	0.296669	0.207707	0.115475	0.0568127
1203	Case	27.6112	Male	0.407797	0.292859	0.163557	0.0896136	0.046175
1204	Case	48.0657	Female	0.318809	0.268408	0.23076	0.1339	0.0481223
1205	Case	37.3634	Female	0.215195	0.240833	0.359993	0.132044	0.0519359
1206	Case	38.4285	Male	0.16377	0.424707	0.168825	0.171953	0.0707464
1207	Case	31.3753	Female	0.376113	0.337781	0.177541	0.0678659	0.0406982
1208	Case	36.6352	Female	0.399598	0.300204	0.167883	0.0958409	0.0364745
1209	Case	46.4257	Male	0.505109	0.243004	0.174105	0.0442514	0.0335336
1210	Case	45.7057	Male	0.182251	0.724835	0.0517577	0.0284359	0.0127223
1211	Case	41.9603	Male	0.170424	0.69156	0.0911232	0.0288736	0.0180195
1212	Case	46.7598	Male	0.222308	0.188493	0.403769	0.126137	0.0592918
1213	Case	28.1451	Male	0.35923	0.584685	0.0254377	0.0221305	0.00851864
1214	Case	47.7644	Female	0.172123	0.792339	0.018005	0.00679318	0.0107414
1215	Case	43.091	Male	0.324514	0.555611	0.0517714	0.0445109	0.0235923
1216	Case	21.9055	Female	0.350719	0.0574659	0.420925	0.118735	0.052155
1217	Case	35.77	Male	0.415494	0.488955	0.0464582	0.0348459	0.0142486
1218	Case	43.8713	Male	0.23733	0.650264	0.0728623	0.024715	0.0148305
1219	Case	33.6274	Male	0.118374	0.147438	0.522352	0.126754	0.0850827
1220	Case	52.2	Male	0.228627	0.288632	0.23503	0.184078	0.0636336
1221	Case	42.412	Female	0.251036	0.700606	0.0483577	0	0
1222	Case	35	Female	0.216769	0.730736	0.0524959	0	0
1223	Case	39	Female	0.268711	0.678767	0.0525218	0	0
1224	Case	54	Female	0.218703	0.741478	0.0398209	0	0
1225	Case	44	Female	0.244094	0.710919	0.0449864	0	0
1226	Case	34	Female	0.28172	0.669673	0.0486077	0	0
1227	Case	37	Female	0.199906	0.756356	0.0437386	0	0
1228	Case	41	Female	0.200865	0.761603	0.0375314	0	0
1229	Case	37	Female	0.21915	0.735451	0.0453991	0	0
1230	Case	64	Male	0.261438	0.702805	0.0357559	0	0
1231	Case	40	Female	0.154478	0.79748	0.0480427	0	0
1232	Case	39	Male	0.270623	0.67633	0.0530473	0	0
1233	Control	54	Female	0.220515	0.746275	0.0332095	0	0
1234	Control	52	Female	0.196057	0.758505	0.0454386	0	0
1235	Case	48	Female	0.161127	0.801796	0.0370768	0	0
1236	Case	64	Female	0.25281	0.698884	0.0483068	0	0
1237	Case	46	Female	0.250435	0.705398	0.0441677	0	0
1238	Case	43	Female	0.209848	0.739786	0.0503636	0	0
1239	Control	39	Female	0.204428	0.678448	0.117123	0	0
1240	Case	51	Female	0.195216	0.764145	0.0406382	0	0
1241	Case	40	Female	0.234093	0.720569	0.0453386	0	0
1242	Case	50	Female	0.235819	0.719129	0.0450536	0	0
1243	Case	58	Female	0.212049	0.511696	0.276255	0	0
1244	Case	54	Female	0.210092	0.748915	0.0409927	0	0
1245	Control	49	Female	0.245526	0.706747	0.0477268	0	0
1246	Control	48	Female	0.21519	0.742256	0.0425541	0	0
1247	Control	49	Male	0.26793	0.689541	0.0425309	0	0
1248	Control	48	Male	0.255164	0.680873	0.0639623	0	0
1249	Control	47	Female	0.270103	0.673194	0.0567032	0	0
1250	Case	37	Male	0.26181	0.698647	0.0395418	0	0
1251	Case	41	Female	0.24526	0.711686	0.0430523	0	0
1252	Case	44	Male	0.235645	0.720324	0.0440305	0	0
1253	Case	49	Male	0.288257	0.667166	0.0445782	0	0
1254	Case	41	Male	0.236024	0.721195	0.0427809	0	0
1255	Case	46	Female	0.204918	0.752953	0.0421295	0	0
1256	Case	41	Female	0.23105	0.729572	0.0393759	0	0
1257	Control	41	Female	0.193135	0.769465	0.0374027	0	0
1258	Case	43	Male	0.286328	0.680442	0.0332309	0	0
1259	Case	46	Male	0.26736	0.65547	0.0771695	0	0
1260	Case	48	Male	0.270451	0.67751	0.0520377	0	0
1261	Control	40	Female	0.219947	0.736982	0.0430709	0	0
1262	Control	44	Female	0.239611	0.710007	0.0503827	0	0
1263	Control	58	Female	0.254533	0.701135	0.0443323	0	0
1264	Control	39	Female	0.242292	0.708832	0.0488764	0	0
1265	Control	48	Male	0.264542	0.695342	0.0401145	0	0
1266	Control	47	Female	0.192933	0.616532	0.190535	0	0
1267	Control	40	Female	0.259079	0.66058	0.0803427	0	0
1268	Control	53	Female	0.240832	0.709551	0.0496177	0	0
1269	Control	53	Female	0.269605	0.68676	0.0436368	0	0
1270	Case	39	Female	0.244635	0.708797	0.0465655	0	0
1271	Control	43	Female	0.240247	0.72067	0.0390836	0	0
1272	Control	39	Female	0.210513	0.744626	0.0448614	0	0
1273	Control	44	Female	0.257567	0.7021	0.0403355	0	0
1274	Control	66	Female	0.235951	0.715756	0.0482914	0	0
1275	Control	41	Female	0.166045	0.79512	0.0388377	0	0
1276	Control	55	Female	0.184238	0.782684	0.0330782	0	0
1277	Control	42	Male	0.17392	0.790929	0.0351505	0	0
1278	Control	42	Female	0.258314	0.688185	0.0535009	0	0
1279	Control	46	Female	0.23676	0.72634	0.0369009	0	0
1280	Control	43	Female	0.215403	0.738581	0.0460159	0	0
1281	Control	41	Female	0.20958	0.751615	0.0388055	0	0
1282	Control	54	Female	0.226286	0.724334	0.04938	0	0
1283	Control	47	Female	0.247294	0.700246	0.0524605	0	0
1284	Control	45	Female	0.193778	0.763491	0.0427309	0	0
1285	Control	48	Female	0.203962	0.761871	0.0341659	0	0
1286	Control	48	Female	0.254764	0.707586	0.03765	0	0
1287	Control	39	Female	0.0570423	0.903737	0.0392218	0	0
1288	Control	45	Female	0.23756	0.713319	0.0491227	0	0
1289	Control	52	Female	0.241778	0.661593	0.0966277	0	0
1290	Control	56	Female	0.275826	0.67391	0.0502632	0	0
1291	Control	47	Female	0.23347	0.725467	0.0410655	0	0
1292	Control	50	Male	0.241395	0.71459	0.0440145	0	0
1293	Control	48	Female	0.260354	0.698524	0.0411218	0	0
1294	Control	48	Male	0.0590791	0.904045	0.0368745	0	0
1295	Control	43	Female	0.234458	0.726233	0.0393077	0	0
1296	Control	50	Male	0.267112	0.687614	0.0452732	0	0
1297	Control	48	Female	0.203763	0.765184	0.0310514	0	0
1298	Control	39	Female	0.0537445	0.907582	0.0386727	0	0
1299	Control	48	Female	0.209295	0.74631	0.0443964	0	0
1300	Control	52	Female	0.259808	0.691623	0.0485691	0	0
1301	Control	50	Female	0.200209	0.709915	0.0898768	0	0
1302	Control	43	Female	0.212709	0.740987	0.0463036	0	0
1303	Control	46	Female	0.262362	0.686396	0.0512409	0	0
1304	Control	56	Female	0.233454	0.712751	0.053795	0	0
1305	Control	42	Female	0.222965	0.737477	0.0395586	0	0
1306	Control	40	Female	0.264336	0.691078	0.0445882	0	0
1307	Control	38	Female	0.2207	0.731685	0.0476155	0	0
1308	Control	39	Female	0.182399	0.777283	0.0403186	0	0
1309	Control	51	Male	0.202068	0.753775	0.0441577	0	0
1310	Control	52	Female	0.225949	0.736083	0.0379695	0	0
1311	Control	59	Female	0.252736	0.698465	0.0487986	0	0
1312	Control	42	Female	0.196622	0.762379	0.0410005	0	0
1313	Control	51	Female	0.0472895	0.916704	0.0360064	0	0
1314	Control	47	Female	0.279655	0.660745	0.0595995	0	0
1315	Control	42	Female	0.0607655	0.904381	0.0348545	0	0
1316	Control	43	Female	0.247013	0.701399	0.0515877	0	0
1317	Control	50	Female	0.0641977	0.898757	0.0370468	0	0
1318	Control	52	Female	0.279281	0.679	0.0417173	0	0
1319	Control	41	Female	0.230825	0.729885	0.0392891	0	0
1320	Control	41	Female	0.203221	0.760307	0.0364732	0	0
1321	Control	44	Female	0.236685	0.716174	0.0471409	0	0
1322	Control	42	Female	0.220546	0.733107	0.0463477	0	0
1323	Control	42	Female	0.261597	0.692817	0.0455855	0	0
1324	Case	27	Female	0.218215	0.746945	0.0348386	0	0
1325	Control	24	Male	0.213647	0.7505	0.0358532	0	0
1326	Control	45	Female	0.242548	0.703703	0.0537495	0	0
1327	Control	26	Female	0.209507	0.745585	0.0449068	0	0
1328	Control	25	Female	0.266673	0.680955	0.0523714	0	0
1329	Control	25	Female	0.216066	0.740632	0.0433027	0	0
1330	Control	27	Male	0.198932	0.767588	0.0334786	0	0
1331	Control	27	Female	0.226292	0.736371	0.0373373	0	0
1332	Control	28	Female	0.231374	0.724075	0.0445477	0	0
1333	Case	25	Female	0.217846	0.669566	0.112588	0	0
1334	Control	26	Female	0.1977	0.762066	0.0402327	0	0
1335	Control	26	Female	0.242896	0.707472	0.0496295	0	0
1336	Control	27	Female	0.18291	0.77368	0.04341	0	0
1337	Control	27	Female	0.254876	0.698582	0.0465414	0	0
1338	Control	25	Female	0.200979	0.761784	0.0372364	0	0
1339	Control	26	Female	0.26319	0.683125	0.053685	0	0
1340	Control	26	Female	0.21052	0.757282	0.0322	0	0
1341	Control	27	Female	0.250591	0.70442	0.04499	0	0
1342	Control	46	Female	0.200692	0.759659	0.0396491	0	0
1343	Control	23	Female	0.208419	0.74779	0.0437927	0	0
1344	Control	27	Female	0.221418	0.734422	0.0441618	0	0
1345	Control	24	Female	0.254488	0.70188	0.0436314	0	0
1346	Control	24	Female	0.248852	0.69909	0.0520568	0	0
1347	Control	26	Female	0.191754	0.769651	0.0385959	0	0
1348	Control	26	Male	0.230229	0.73074	0.0390305	0	0
1349	Control	27	Female	0.200559	0.751407	0.0480336	0	0
1350	Control	24	Female	0.241438	0.711649	0.0469136	0	0
1351	Control	27	Female	0.256931	0.700131	0.0429382	0	0
1352	Control	21	Female	0.212299	0.746291	0.04141	0	0
1353	Control	27	Female	0.238106	0.720666	0.0412277	0	0
1354	Case	48	Female	0.250527	0.684364	0.0651073	0	0
1355	Case	51	Female	0.229371	0.716513	0.054115	0	0
1356	Case	49	Male	0.246436	0.715382	0.0381809	0	0
1357	Case	33	Male	0.245066	0.709812	0.0451214	0	0
1358	Control	26	Female	0.210038	0.74457	0.0453932	0	0
1359	Control	43	Male	0.222578	0.738299	0.0391223	0	0
1360	Case	45	Male	0.257454	0.686782	0.0557632	0	0
1361	Case	51	Female	0.245073	0.69939	0.0555377	0	0
1362	Control	44	Female	0.0488195	0.921161	0.0300195	0	0
1363	Control	25	Female	0.248455	0.71002	0.041525	0	0
1364	Case	40	Female	0.236613	0.716157	0.04723	0	0
1365	Control	27	Female	0.123564	0.844891	0.0315455	0	0
1366	Control	25	Female	0.239334	0.709633	0.0510327	0	0
1367	Control	25	Female	0.228429	0.72114	0.0504314	0	0
1368	Control	24	Female	0.242096	0.711387	0.0465168	0	0
1369	Control	26	Female	0.242522	0.706201	0.0512764	0	0
1370	Control	21	Male	0.21484	0.750915	0.0342459	0	0
1371	Control	22	Female	0.23694	0.718687	0.0443709	0	0
1372	Control	26	Female	0.24098	0.708346	0.0506741	0	0
1373	Control	25	Female	0.254537	0.693235	0.0522273	0	0
1374	Control	39	Female	0.293177	0.66808	0.0387441	0	0
1375	Control	49	Male	0.253649	0.69945	0.0469027	0	0
1376	Control	48	Male	0.278175	0.684199	0.0376264	0	0
1377	Control	38	Female	0.222452	0.734358	0.0431891	0	0
1378	Control	53	Female	0.242781	0.70829	0.0489295	0	0
1379	Control	26	Female	0.252392	0.696915	0.0506923	0	0
1380	Control	25	Female	0.25392	0.696721	0.0493605	0	0
1381	Control	25	Female	0.254718	0.706857	0.0384255	0	0
1382	Control	43	Male	0.313015	0.624575	0.0352573	0.0110832	0.0160695
1383	Control	39	Female	0.481994	0.319577	0.107592	0.0509241	0.0399114
1384	Control	48	Female	0.454805	0.385445	0.0890077	0.0435491	0.0271932
1385	Control	50	Female	0.635869	0.0783314	0.212977	0.0473855	0.0254355
1386	Control	63	Female	0.247894	0.700562	0.0270732	0.0143082	0.0101627
1387	Control	23	Male	0.528554	0.232309	0.134377	0.0691832	0.0355791
1388	Case	51	Male	0.552292	0.0708123	0.27759	0.0601764	0.0391277
1389	Case	54	Female	0.310903	0.472286	0.119905	0.057785	0.03912
1390	Case	48	Male	0.720621	0.0392132	0.20279	0.0220091	0.015365
1391	Case	34	Female	0.560368	0.412823	0.0119418	0.00619545	0.00867
1392	Case	35	Female	0.365463	0.597154	0.0223027	0.00827955	0.00680318
1393	Case	45	Male	0.487676	0.151103	0.255416	0.0749041	0.0309009
1394	Case	71	Female	0.544269	0.0728164	0.256872	0.0834586	0.042585
1395	Control	32	Female	0.438569	0.104081	0.334114	0.0722614	0.0509759
1396	Control	17	Male	0.296242	0.470492	0.173211	0.0389436	0.0211114
1397	Control	65	Male	0.2573	0.195963	0.336036	0.144187	0.0665118
1398	Control	31	Female	0.346805	0.102276	0.392951	0.10513	0.0528386
1399	Control	40	Male	0.545854	0.321566	0.0844805	0.0266695	0.0214295
1400	Control	17	Female	0.399644	0.375045	0.17574	0.0287123	0.0208595
1401	Case	45	Male	0.487645	0.16767	0.281986	0.0364759	0.0262236
1402	Control	56	Male	0.434031	0.525124	0.0231759	0.0101468	0.00752091
1403	Case	31	Male	0.62065	0.262133	0.0876682	0.0115618	0.0179895
1404	Case	71	Male	0.527658	0.445423	0.0111205	0.00837045	0.00742864
1405	Control	48	Female	0.405518	0.537319	0.03466	0.0165855	0.00591682
1406	Control	42	Female	0.313435	0.236131	0.306732	0.0967541	0.0469459
1407	Control	22	Female	0.53166	0.255001	0.123441	0.0604832	0.0294123
1408	Case	44	Male	0.620446	0.318286	0.0414268	0.0119232	0.00791682
1409	Case	38	Male	0.518324	0.244082	0.169365	0.0340591	0.0341686
1410	Case	58	Male	0.64238	0.101054	0.160945	0.0593609	0.0362614
1411	Control	33	Female	0.553229	0.137331	0.228531	0.05164	0.0292709
1412	Control	27	Male	0.330286	0.508058	0.103349	0.0401105	0.0181973
1413	Case	26	Male	0.331912	0.595763	0.0503523	0.0125114	0.00946182
1414	Control	33	Female	0.382264	0.115859	0.388937	0.0678927	0.0450486
1415	Case	39	Female	0.42317	0.236134	0.229897	0.0786891	0.0321118
1416	Case	44	Male	0.461544	0.215584	0.26708	0.0356164	0.0201764
1417	Control	35	Male	0.373518	0.14397	0.334635	0.0969432	0.0509345
1418	Case	54	Female	0.369386	0.39279	0.16558	0.0469045	0.0253409
1419	Case	26	Female	0.509265	0.0792018	0.275217	0.0901845	0.0461305
1420	Control	74	Male	0.19557	0.0261182	0.659664	0.0759041	0.0427432
1421	Control	42	Female	0.551406	0.298034	0.115815	0.0244114	0.0103332
1422	Control	57	Male	0.203672	0.0612991	0.5873	0.0984218	0.0493068
1423	Case	33	Male	0.293532	0.681951	0.00896955	0.00669273	0.00885364
1424	Control	34	Male	0.596279	0.0882082	0.259166	0.0359714	0.0203759
1425	Control	45	Female	0.844761	0.130116	0.0149595	0.00700955	0.00315409
1426	Control	42	Male	0.858267	0.104735	0.0224332	0.0110873	0.00348045
1427	Control	65	Female	0.652072	0.306757	0.0240641	0.00719773	0.00990818
1428	Control	44	Male	0.552977	0.263759	0.140669	0.0296323	0.0129609
1429	Case	40	Male	0.25908	0.70623	0.0173714	0.00922455	0.00809227
1430	Control	42	Male	0.661939	0.123057	0.134571	0.0488268	0.0316041
1431	Case	49	Male	0.625261	0.30219	0.04342	0.0166764	0.012455
1432	Control	35	Male	0.27635	0.0986977	0.443027	0.110361	0.0715645
1433	Control	41	Female	0.276864	0.18973	0.378358	0.09152	0.0635277
1434	Control	58	Male	0.276547	0.0521323	0.456685	0.140009	0.0746295
1435	Control	78	Male	0.452768	0.409418	0.0757277	0.0399409	0.0221455
1436	Control	50	Female	0.425323	0.0350118	0.415949	0.0856814	0.0380364
1437	Control	79	Male	0.435056	0.0867991	0.321415	0.106665	0.0500668
1438	Control	46	Male	0.277262	0.0790827	0.468397	0.11617	0.0590905
1439	Control	60	Female	0.726059	0.045895	0.172628	0.03696	0.0184591
1440	Control	37	Female	0.271995	0.0708005	0.42607	0.154326	0.0768082
1441	Control	53	Female	0.458087	0.129484	0.321125	0.0623627	0.028945
1442	Control	27	Female	0.695327	0.0392382	0.195213	0.0475945	0.0226259
1443	Control	31	Female	0.315403	0.653095	0.015365	0.00979682	0.00634091
1444	Control	42	Female	0.648241	0.0824559	0.178669	0.0514268	0.0392077
1445	Control	42	Female	0.793854	0.157295	0.0305173	0.00958455	0.00874909
1446	Control	22	Female	0.584716	0.203587	0.150677	0.03802	0.0230005
1447	Case	47	Male	0.69498	0.218033	0.0548795	0.0232541	0.008855
1448	Control	21	Female	0.286937	0.0836423	0.462576	0.102522	0.0643227
1449	Case	40	Female	0.517878	0.0507473	0.341077	0.0571041	0.0331914
1450	Case	44	Male	0.17307	0.0534059	0.629291	0.0857859	0.0584468
1451	Case	44	Male	0.526357	0.0831686	0.260488	0.0947423	0.0352455
1452	Control	42	Female	0.470383	0.0692873	0.33202	0.0915318	0.0367773
1453	Control	28	Female	0.405849	0.4338	0.0865814	0.0467482	0.0270218
1454	Control	70	Male	0.005355	0.00925545	0.858379	0.0696577	0.0573523
1455	Control	55	Female	0.547513	0.227375	0.170633	0.0358532	0.0186277
1456	Control	50	Female	0.356439	0.611971	0.014035	0.0112027	0.00635182
1457	Control	71	Male	0.473047	0.0658523	0.289802	0.113539	0.05776
1458	Control	24	Male	0.351468	0.607445	0.0195141	0.0108914	0.0106818
1459	Control	19	Female	0.353623	0.238903	0.292418	0.0715845	0.0434705
1460	Control	21	Female	0.400076	0.0832264	0.37255	0.0964909	0.0476573
1461	Control	26	Female	0.0318032	0.94391	0.0100195	0.00643182	0.00783455
1462	Control	27	Male	0.340786	0.558585	0.0603555	0.0222177	0.0180577
1463	Control	26	Female	0.389067	0.112801	0.384984	0.0721118	0.0410368
1464	Control	57	Female	0.47684	0.0706136	0.33475	0.0735364	0.0442591
1465	Control	54	Male	0.719756	0.0575159	0.159246	0.0447305	0.0187514
1466	Control	61	Female	0.632791	0.240424	0.0874341	0.0250977	0.0142527
1467	Control	30	Female	0.0343223	0.933921	0.0138118	0.0100159	0.00792909
1468	Control	46	Female	0.208264	0.288707	0.330327	0.107743	0.0649559
1469	Case	48	Female	0.738746	0.15235	0.0612259	0.0328318	0.0148441
1470	Control	24	Female	0.559237	0.270417	0.105016	0.039335	0.0259932
1471	Control	71	Female	0.20704	0.747777	0.0223364	0.0149505	0.00789636
1472	Control	23	Female	0.561363	0.301479	0.0879873	0.0326186	0.0165509
1473	Control	20	Female	0.482019	0.0828527	0.334253	0.0570541	0.0438223
1474	Control	44	Female	0.921988	0.0228136	0.0392955	0.00862864	0.00727636
1475	Control	35	Female	0.825862	0.0510882	0.0883705	0.025605	0.00907591
1476	Control	52	Male	0.235555	0.114234	0.513961	0.0801541	0.0560968
1477	Control	28	Female	0.45511	0.146489	0.278127	0.0799791	0.0402941
1478	Case	51	Male	0.375747	0.0365	0.494046	0.0586041	0.0351009
1479	Case	78	Female	0.228127	0.0729873	0.491615	0.136375	0.0708932
1480	Case	35	Female	0.452919	0.0580618	0.325803	0.110613	0.0526036
1481	Case	54	Female	0.242119	0.0424818	0.568399	0.0991641	0.0478341
1482	Control	26	Female	0.800152	0.0886073	0.0710459	0.0254536	0.0147391
1483	Control	19	Female	0.826696	0.123105	0.0311105	0.0120309	0.00705864
1484	Case	18	Female	0.354792	0.215313	0.276623	0.106754	0.0465173
1485	Case	44	Male	0.385725	0.11722	0.323705	0.111482	0.0618659
1486	Case	22	Male	0.520577	0.188641	0.180327	0.0818341	0.0286214
1487	Case	20	Female	0.296395	0.443395	0.151424	0.0698077	0.0389773
1488	Case	58	Male	0.247142	0.412661	0.192356	0.0969527	0.0508873
1489	Case	54	Male	0.213582	0.286648	0.325384	0.11856	0.0558245
1490	Case	23	Male	0.437067	0.348083	0.131378	0.0543959	0.0290759
1491	Case	37	Male	0.320871	0.365565	0.13829	0.102548	0.0727264
1492	Case	50	Male	0.450416	0.351136	0.115466	0.0564559	0.0265245
1493	Case	27	Female	0.267372	0.238579	0.289793	0.136367	0.0678877
1494	Case	50	Male	0.155507	0.522739	0.170927	0.0944305	0.0563977
1495	Case	37	Female	0.314447	0.31877	0.194471	0.115044	0.0572673
1496	Case	57	Male	0.198603	0.184905	0.325144	0.200086	0.0912641
1497	Case	18	Female	0.272089	0.347454	0.174523	0.15233	0.0536064
1498	Case	47	Male	0.593852	0.20919	0.113364	0.0568068	0.0267845
1499	Case	53	Female	0.231382	0.216593	0.334666	0.148677	0.0686836
1500	Case	58	Male	0.377194	0.258302	0.253526	0.0672068	0.0437705
1501	Case	46	Male	0.18722	0.0755373	0.451402	0.181892	0.103953
1502	Case	50	Female	0.216846	0.208122	0.394286	0.11605	0.0646982
1503	Case	62	Female	0.421505	0.23079	0.149597	0.120637	0.0774686
1504	Case	49	Male	0.31328	0.331739	0.193655	0.0993809	0.0619459
1505	Case	53	Male	0.47626	0.223098	0.153502	0.0852123	0.0619291
1506	Case	44	Male	0.256599	0.176172	0.275031	0.191427	0.100769
1507	Case	49	Female	0.380145	0.224142	0.250203	0.0882245	0.0572859
1508	Case	21	Male	0.504332	0.159835	0.189192	0.0824068	0.0642336
1509	Case	47	Female	0.441785	0.393574	0.0848241	0.0603464	0.0194709
1510	Case	47	Female	0.388375	0.361615	0.142863	0.0673418	0.0398027
1511	Case	36	Female	0.270196	0.342109	0.214774	0.121997	0.0509227
1512	Case	43	Female	0.474527	0.204947	0.19759	0.0738227	0.0491114
1513	Case	39	Male	0.152765	0.181938	0.36602	0.206599	0.0926809
1514	Case	23	Male	0.242603	0.392649	0.20129	0.103725	0.0597318
1515	Case	66	Male	0.169285	0.27773	0.254198	0.191077	0.107713
1516	Case	46	Female	0.359979	0.256172	0.21508	0.10744	0.0613286
1517	Case	40	Female	0.149958	0.430266	0.232553	0.124476	0.0627477
1518	Case	18	Male	0.245277	0.248951	0.268559	0.15508	0.0821309
1519	Case	19	Male	0.313765	0.270549	0.223002	0.12286	0.0698236
1520	Case	30	Male	0.366091	0.26812	0.169003	0.126663	0.0701205
1521	Case	55	Male	0.34351	0.221776	0.232478	0.12579	0.0764473
1522	Case	57	Male	0.393188	0.14699	0.256142	0.126348	0.0773332
1523	Case	26	Male	0.257907	0.386945	0.238911	0.0820914	0.0341455
1524	Case	57	Female	0.390327	0.341255	0.113081	0.107377	0.0479609
1525	Case	41	Female	0.314189	0.311761	0.202115	0.118349	0.0535877
1526	Case	31	Female	0.445534	0.327194	0.11817	0.0794259	0.0296755
1527	Case	42	Male	0.409276	0.268692	0.123572	0.138777	0.0596818
1528	Case	24	Male	0.224122	0.198919	0.354273	0.145587	0.0771009
1529	Case	37	Female	0.293657	0.277023	0.248647	0.118912	0.0617623
1530	Case	52	Male	0.375886	0.292513	0.240121	0.0583532	0.0331255
1531	Case	55	Female	0.237215	0.399013	0.176074	0.127917	0.05978
1532	Case	21	Male	0.322775	0.290553	0.283742	0.0633418	0.0395877
1533	Case	32	Male	0.237838	0.399038	0.227072	0.0927891	0.0432614
1534	Case	31	Female	0.236174	0.286675	0.288123	0.136531	0.0524977
1535	Case	48	Female	0.322663	0.418233	0.136644	0.0836818	0.0387814
1536	Case	47	Female	0.44468	0.44286	0.0594773	0.0358905	0.0170918
1537	Case	21	Female	0.273159	0.330647	0.247059	0.0973591	0.0517759
1538	Case	18	Female	0.27812	0.365288	0.190602	0.113594	0.0523941
1539	Case	51	Female	0.462395	0.162719	0.233192	0.0848395	0.0568555
1540	Case	21	Male	0.30188	0.355892	0.17711	0.112132	0.0529877
1541	Case	41	Male	0.259916	0.303779	0.22226	0.15056	0.0634882
1542	Case	68	Male	0.180537	0.342249	0.249992	0.153821	0.0733991
1543	Case	19	Male	0.532435	0.215767	0.141019	0.0659595	0.0448177
1544	Case	47	Female	0.21447	0.419383	0.265021	0.0675418	0.0335836
